# Supplementary material for: Pyrazolo[3,4-d]pyrimidines as sigma-1 receptor ligands for the treatment of pain. Part 2: Introduction of cyclic substituents in position 4
Source: Royal Society of Chemistry journal article supplement (doi:10.1039/c7md00078b), 2017-01-01
Supplement: c7md00078b1.pdf [file c7md00078b1.pdf]

**Supporting Information**

**Pyrazolo[3,4-*d*]pyrimidines as Sigma-1 Receptor  
Ligands. Part 2: Introduction of Cyclic Substituents  
in Position 4.**

*José Luis Díaz<sup>§\*</sup>, Jordi Corbera<sup>§</sup>, Daniel Martínez<sup>§</sup>, Magda Bordas<sup>§</sup>, Cristina Sicre<sup>#</sup>, Rosalia Pascual<sup>§</sup>,  
M<sup>a</sup> José Pretel<sup>§</sup>, Ana Paz Marín<sup>§</sup>, Ana Montero<sup>§</sup>, Albert Dordal<sup>§</sup>, Inés Alvarez<sup>§</sup>, and Carmen Almansa<sup>§\*</sup>*

<sup>§</sup>Drug Discovery and Preclinical Development, Esteve, Baldiri Reixach, 4-8, 08028 Barcelona, Spain.

<sup>#</sup>Galchimia, Cebreiro s/n 15823 O Pino A Coruña, Spain.

**Analytical data: purity, NMR, HRMS**

## Analytical data

### Analytical LC Methods

**Method 1:** Column Acquity UPLC BEH C18 2.1x50 mm, 1.7  $\mu\text{m}$ ; flow rate 0.6 mL/min; A: Ammonium bicarbonate 10mM; B: ACN; Gradient: 0.3 min in 98% A, 98% A to 5% A in 2.52 min, 1.02 min in 5% A.

**Method 2:** Column XTerra C18 2.1 x 100 mm, 3.5  $\mu\text{m}$ ; flow rate 0.3 mL/min; A: ACN:MeOH 1:1, B: water, C: Ammonium acetate 10 mM pH 10 adjusted with  $\text{NH}_4\text{OH}$ ; Gradient: 8 min in A:B:C 10:85:5, A:B:C 10:85:5 to A:B:C 95:0:5 in 12 min, 10 min in A:B:C 95:0:5.

**Method 3:** Column XBridge C18 4.6 x 50 mm, 2.5  $\mu\text{m}$ ; flow rate 1.5 mL/min; A: Ammonium bicarbonate 10 mM, B: ACN; Gradient: 0.5 min in 98% A, 98 to 5% A in 4 min, 2 min in 5% A.

**Method 4:** Column SunFire C18 2.1 x 100 mm, 3.5  $\mu\text{m}$ ; flow rate 0.3 mL/min; A: ACN:MeOH 1:1, B: water, C: Ammonium acetate 5 mM pH 7; Gradient 3 min in A:B:C 10:85:5, A:B:C 10:85:5 to A:B:C 95:0:5 in 17 min, 10 min in in A:B:C 95:0:5.

**Method 5:** Column Acquity UPLC BEH C18 2.1x50 mm, 1.7  $\mu\text{m}$ ; flow rate 0.6 mL/min; A: Ammonium bicarbonate 10mM; B: ACN; 0.3 min in 90% A, 90% A to 5% A in 2.7 min, 0.7 min in 5% A.

**Method 6:** Column SunFire C18 2.1 x 100 mm, 3.5  $\mu\text{m}$ ; flow rate 0.3 mL/min; A: ACN:MeOH 1:1, B: water, C: Ammonium acetate 5 mM pH 7; Gradient 3 min in A:B:C 5:90:5, A:B:C 5:90:5 to A:B:C 95:0:5 in 15 min, 10 min in in A:B:C 95:0:5.

**Method 7:** Column XBridge C18 4.6 x 50 mm, 2.5  $\mu\text{m}$ ; flow rate 2 mL/min; A: Ammonium bicarbonate 10 mM, B: ACN; Gradient: 0.5 min in 98% A, 98 to 5% A in 3.7 min, 2 min in 5% A.

| comp | PURITY (%) | Rt (min) | Method | FORM      | NMR                                                                                                                                                                                                                                               | HRMS [M+H] <sup>+</sup> (diff ppm) |
|------|------------|----------|--------|-----------|---------------------------------------------------------------------------------------------------------------------------------------------------------------------------------------------------------------------------------------------------|------------------------------------|
| 9a   | 99         | 1.66     | 1      | Free Base | <sup>1</sup> H NMR (300 MHz, $\text{CDCl}_3$ ) $\delta$ 8.34 (1H, s), 7.93 (1H, s), 4.79 – 4.49 (2H, m), 4.05 – 3.81 (4H, m), 3.27 – 2.94 (2H, m), 2.84 – 2.49 (4H, m), 1.90 – 1.35 (12H, m).                                                     | 315.2299 (2.41)                    |
| 9b   | 98         | 1.69     | 1      | Free Base | <sup>1</sup> H NMR (400 MHz, $\text{CDCl}_3$ ) $\delta$ 8.38 (1H, s), 7.94 (1H, s), 4.54 (2H, t, $J=7.2$ Hz), 4.14 – 4.06 (4H, m), 2.85 (2H, t, $J=7.2$ Hz), 2.48 (4H, t, $J=5.4$ Hz), 2.20 – 2.05 (4H, m), 1.59 – 1.48 (4H, m), 1.45 – 1.36 (2H, | 351.2108 (1.3)                     |

|           |    |      |   |           |                                                                                                                                                                                                                                                                                                                                            |                 |
|-----------|----|------|---|-----------|--------------------------------------------------------------------------------------------------------------------------------------------------------------------------------------------------------------------------------------------------------------------------------------------------------------------------------------------|-----------------|
|           |    |      |   |           | m).                                                                                                                                                                                                                                                                                                                                        |                 |
| <b>9c</b> | 95 | 3.80 | 3 | Free Base | <sup>1</sup> H NMR (400 MHz, CD <sub>3</sub> OD) δ 8.24 (1H, s), 8.12 (1H, s), 4.59 (2H, t, <i>J</i> = 6.6 Hz), 4.02 – 3.79 (2H, m), 3.68 – 3.49 (2H, m), 3.24 – 3.07 (2H, m), 2.92 – 2.69 (4H, m), 2.09 – 1.79 (2H, m), 1.67 (4H, p, <i>J</i> = 5.7 Hz), 1.59 – 1.46 (2H, m), 1.30 – 1.14 (6H, m).                                        | 329.2456 (2.25) |
| <b>9d</b> | 99 | 1.56 | 1 | Free Base | <sup>1</sup> H NMR (400 MHz, CD <sub>3</sub> OD) δ 8.24 (1H, s), 8.15 (1H, s), 7.48 – 7.30 (4H, m), 7.25 (1H, t, <i>J</i> = 6.9 Hz), 4.58 – 4.45 (2H, m), 4.39 – 3.52 (6H, m), 2.86 (2H, t, <i>J</i> = 6.5 Hz), 2.69 – 2.38 (4H, m), 2.39 – 2.11 (1H, m), 1.63 – 1.49 (4H, m), 1.44 (2H, d, <i>J</i> = 5.7 Hz).                            | 377.2453 (1.4)  |
| <b>9e</b> | 99 | 0.82 | 1 | Free Base | <sup>1</sup> H NMR (300 MHz, CDCl <sub>3</sub> ) δ 8.36 (1H, s), 7.92 (1H, s), 4.59 (2H, t, <i>J</i> = 7.0 Hz), 4.21 – 3.36 (4H, m), 3.11 – 2.91 (2H, m), 2.69 – 2.55 (4H, m), 2.52 (3H, s), 2.40 – 2.01 (1H, m), 1.88 – 1.68 (2H, m), 1.69 – 1.56 (4H, m), 1.53 – 1.27 (2H, m).                                                           | 330.2404 (1.14) |
| <b>9f</b> | 96 | 1.45 | 1 | Free Base | <sup>1</sup> H NMR (400 MHz, CDCl <sub>3</sub> ) δ 8.68 (1H, s), 8.63 (1H, s), 4.63 (2H, t, <i>J</i> = 7.1 Hz), 4.20 (2H, t, <i>J</i> = 7.1 Hz), 2.93 (2H, t, <i>J</i> = 7.1 Hz), 2.75 (2H, t, <i>J</i> = 8.1 Hz), 2.60 – 2.46 (4H, m), 2.35 – 2.15 (2H, m), 1.66 – 1.48 (4H, m), 1.48 – 1.35 (2H, m).                                     | 315.1933 (1.75) |
| <b>9g</b> | 97 | 1.10 | 1 | Free Base | <sup>1</sup> H NMR (400 MHz, CDCl <sub>3</sub> ) δ 8.83 (1H, s), 8.65 (1H, dd, <i>J</i> = 1.3, 0.9 Hz), 8.25 (1H, s), 7.93 (1H, t, <i>J</i> = 1.5 Hz), 7.31 (1H, dd, <i>J</i> = 1.6, 0.9 Hz), 4.67 (2H, t, <i>J</i> = 6.9 Hz), 2.89 (2H, t, <i>J</i> = 6.9 Hz), 2.47 (4H, t, <i>J</i> = 5.3 Hz), 1.54 – 1.44 (4H, m), 1.45 – 1.33 (2H, m). | 298.1778 (1.25) |

|            |     |       |   |           |                                                                                                                                                                                                                                                                                                  |                 |
|------------|-----|-------|---|-----------|--------------------------------------------------------------------------------------------------------------------------------------------------------------------------------------------------------------------------------------------------------------------------------------------------|-----------------|
| <b>9h</b>  | 100 | 1.54  | 1 | Free Base | <sup>1</sup> H NMR (300 MHz, CD <sub>3</sub> OD) δ 9.18 (1H, s), 8.99 (1H, s), 8.74 – 8.55 (2H, m), 7.82 (1H, dd, <i>J</i> = 1.8, 6.5 Hz), 7.57 – 7.37 (2H, m), 4.73 (2H, t, <i>J</i> = 6.8 Hz), 2.96 (2H, t, <i>J</i> = 6.6 Hz), 2.65 – 2.47 (4H, m), 1.66 – 1.49 (4H, m), 1.49 – 1.33 (2H, m). | 348.1935 (1.03) |
| <b>9i</b>  | 97  | 1.33  | 1 | Free Base | <sup>1</sup> H NMR (400 MHz, CDCl <sub>3</sub> ) δ 8.83 (1H, s), 8.29 (1H, br s), 8.18 (1H, s), 6.46 – 6.33 (1H, m), 4.62 (2H, t, <i>J</i> = 6.8 Hz), 2.96 (2H, t, <i>J</i> = 6.9 Hz), 2.57 (3H, s), 2.54 (4H, t, <i>J</i> = 5.3 Hz), 2.29 (3H, s), 1.62 – 1.49 (4H, m), 1.49 – 1.34 (2H, m).    | 325.2141 (1.9)  |
| <b>10a</b> | 99  | 1.60  | 1 | Free Base | <sup>1</sup> H NMR (300 MHz, CD <sub>3</sub> OD) δ 9.00 (1H, s), 8.53 (1H, s), 8.32 – 8.16 (2H, m), 7.63 (3H, dq, <i>J</i> = 5.3, 2.0 Hz), 4.70 (2H, t, <i>J</i> = 6.8 Hz), 2.94 (2H, t, <i>J</i> = 6.8 Hz), 2.54 (4H, t, <i>J</i> = 5.2 Hz), 1.64 – 1.49 (4H, m), 1.49 – 1.37 (2H, m).          | 308.1786 (1.97) |
| <b>10b</b> | 98  | 16.96 | 4 | Free Base | <sup>1</sup> H NMR (250 MHz, CDCl <sub>3</sub> ) δ 9.07 (1H, s), 8.00 (1H, s), 7.53 (1H, d, <i>J</i> = 7.1 Hz), 7.51 – 7.29 (3H, m), 4.67 (2H, t, <i>J</i> = 7.2 Hz), 2.99 – 2.80 (2H, m), 2.60 – 2.45 (4H, m), 2.43 (3H, s), 1.63 – 1.47 (4H, m), 1.47 – 1.34 (2H, m).                          | 322.2032 (1.81) |
| <b>10c</b> | 95  | 18.03 | 4 | HCl       | <sup>1</sup> H NMR (250 MHz, CDCl <sub>3</sub> ) δ 12.71 (1H, s), 9.12 (1H, s), 8.44 (1H, s), 8.17 – 7.92 (2H, m), 7.63 – 7.35 (2H, m), 5.43 – 4.98 (2H, m), 3.88 – 3.54 (4H, m), 2.95 – 2.58 (2H, m), 2.50 (3H, s), 2.42 – 2.18 (2H, m), 1.56 – 1.09 (3H, m), 1.09 – 0.64 (1H, m).              | 322.2030 (1.26) |
| <b>10d</b> | 98  | 12.54 | 4 | HCl       | <sup>1</sup> H NMR (250 MHz, CDCl <sub>3</sub> ) δ 12.58 (1H, s), 9.25 (1H, s), 8.35 (1H, s), 7.88 (1H, d, <i>J</i> = 7.2 Hz), 7.60 (1H, t, <i>J</i> = 7.8 Hz), 7.19 (1H, t, <i>J</i> = 7.0 Hz),                                                                                                 | 352.2136 (1.23) |

|            |    |      |   |              |                                                                                                                                                                                                                                                                                                     |                 |
|------------|----|------|---|--------------|-----------------------------------------------------------------------------------------------------------------------------------------------------------------------------------------------------------------------------------------------------------------------------------------------------|-----------------|
|            |    |      |   |              | 7.11 (1H, d, $J = 8.4$ Hz),<br>5.28 – 4.98 (2H, m), 4.21<br>(2H, q, $J = 6.6$ Hz), 3.83 –<br>3.52 (4H, m), 2.96 – 2.64<br>(2H, m), 2.43 – 2.12 (2H,<br>m), 1.35 (3H, t, $J = 6.8$ Hz),<br>1.48 – 1.21 (3H, m), 0.98 –<br>0.74 (1H, m).                                                              |                 |
| <b>10e</b> | 95 | 1.99 | 1 | Free<br>Base | <sup>1</sup> H NMR (300 MHz,<br>CDCl <sub>3</sub> ) δ 9.04 (1H, s), 8.33<br>(1H, s), 8.23 (2H, dd, $J =$<br>5.3, 8.9 Hz), 7.28 (2H, t, $J =$<br>8.6 Hz), 4.74 (2H, t, $J = 7.0$<br>Hz), 3.13 – 2.87 (2H, m),<br>2.73 – 2.42 (4H, m), 1.69 –<br>1.51 (4H, m), 1.51 – 1.31<br>(2H, m).                | 326.1781 (0.56) |
| <b>10f</b> | 95 | 1.91 | 1 | Free<br>Base | <sup>1</sup> H NMR (300 MHz,<br>CDCl <sub>3</sub> ) δ 9.00 (1H, s), 8.35<br>(1H, s), 8.21 (2H, d, $J = 8.9$<br>Hz), 7.10 (2H, d, $J = 8.9$<br>Hz), 4.71 (2H, t, $J = 7.0$<br>Hz), 3.92 (3H, s), 3.00 (2H,<br>t, $J = 7.1$ Hz), 2.68 – 2.43<br>(4H, m), 1.67 – 1.51 (4H,<br>m), 1.51 – 1.32 (2H, m). | 338.1980 (1.49) |
| <b>10g</b> | 96 | 1.87 | 1 | Free<br>Base | <sup>1</sup> H NMR (300 MHz,<br>CDCl <sub>3</sub> ) δ 9.10 (1H, s), 8.34<br>(1H, s), 8.32 (2H, d, $J = 8.5$<br>Hz), 7.89 (2H, d, $J = 8.5$<br>Hz), 4.90 – 4.64 (2H, m),<br>3.15 – 2.89 (2H, m), 2.74 –<br>2.45 (4H, m), 1.77 – 1.49<br>(4H, m), 1.50 – 1.33 (2H,<br>m).                             | 333.1828 (1.66) |
| <b>10h</b> | 95 | 1.95 | 1 | Free<br>Base | <sup>1</sup> H NMR (300 MHz,<br>CD <sub>3</sub> OD) δ 9.05 (1H, s),<br>8.13 (1H, s), 7.76 – 7.43<br>(4H, m), 4.71 (2H, t, $J = 6.9$<br>Hz), 2.94 (2H, t, $J = 6.7$<br>Hz), 2.64 – 2.44 (4H, m),<br>1.63 – 1.49 (4H, m), 1.49 –<br>1.32 (2H, m).                                                     | 342.1485 (1.42) |
| <b>10i</b> | 95 | 2.84 | 5 | Free<br>Base | <sup>1</sup> H NMR (300 MHz,<br>CDCl <sub>3</sub> ) δ 9.05 (1H, s), 8.33<br>(1H, s), 8.16 (2H, d, $J = 8.6$<br>Hz), 7.58 (2H, d, $J = 8.6$<br>Hz), 4.78 – 4.71 (2H, m),<br>3.04 – 2.98 (2H, m), 2.61 –<br>2.54 (4H, m), 1.77 – 1.49<br>(4H, m), 1.47 – 1.41 (2H,<br>m).                             | 342.1487 (2.04) |

|            |    |      |   |           |                                                                                                                                                                                                                                                                                                           |                 |
|------------|----|------|---|-----------|-----------------------------------------------------------------------------------------------------------------------------------------------------------------------------------------------------------------------------------------------------------------------------------------------------------|-----------------|
| <b>10j</b> | 97 | 6.30 | 3 | Free Base | <sup>1</sup> H NMR (300 MHz, CDCl <sub>3</sub> ) δ 9.10 (1H, s), 8.06 (1H, s), 7.44 (1H, d, <i>J</i> = 10.4 Hz), 7.43 (1H, s), 7.28 (1H, dd, <i>J</i> = 2.2, 10.4 Hz), 4.73 (2H, t, <i>J</i> = 6.6 Hz), 3.09 – 2.92 (2H, m), 2.70 – 2.49 (4H, m), 2.41 (3H, s), 1.78 – 1.52 (4H, m), 1.53 – 1.30 (2H, m). | 356.1640 (0.92) |
| <b>10k</b> | 95 | 6.33 | 3 | Free Base | <sup>1</sup> H NMR (300 MHz, CD <sub>3</sub> OD) δ 9.00 (1H, s), 8.10 (1H, s), 7.41 – 7.21 (3H, m), 4.71 (2H, t, <i>J</i> = 6.7 Hz), 2.96 (2H, t, <i>J</i> = 6.7 Hz), 2.57 (4H, t, <i>J</i> = 4.9 Hz), 2.40 (3H, s), 2.31 (3H, s), 1.66 – 1.51 (4H, m), 1.51 – 1.36 (2H, m).                              | 336.2187 (1.21) |
| <b>10l</b> | 95 | 1.97 | 1 | Free Base | <sup>1</sup> H NMR (300 MHz, CD <sub>3</sub> OD) δ 9.04 (1H, d, <i>J</i> = 1.9 Hz), 8.27 (1H, dd, <i>J</i> = 2.0, 3.7 Hz), 8.13 – 7.95 (1H, m), 7.35 – 7.15 (2H, m), 4.71 (2H, t, <i>J</i> = 5.7 Hz), 2.95 (2H, t, <i>J</i> = 6.7 Hz), 2.73 – 2.41 (4H, m), 1.66 – 1.51 (4H, m), 1.51 – 1.38 (2H, m).     | 344.1686 (2.19) |
| <b>10m</b> | 99 | 1.88 | 1 | Free Base | <sup>1</sup> H NMR (300 MHz, CDCl <sub>3</sub> ) δ 9.05 (1H, s), 8.05 (1H, s), 7.81 (1H, dd, <i>J</i> = 6.7, 8.5 Hz), 6.95 – 6.71 (2H, m), 4.88 – 4.65 (2H, m), 3.88 (3H, s), 3.22 – 2.89 (2H, m), 2.81 – 2.50 (4H, m), 1.84 – 1.55 (4H, m), 1.55 – 1.32 (2H, m).                                         | 356.1886 (1.49) |
| <b>10n</b> | 95 | 2.03 | 1 | Free Base | <sup>1</sup> H NMR (300 MHz, CDCl <sub>3</sub> ) δ 9.06 (1H, s), 8.00 (1H, s), 7.53 (1H, dd, <i>J</i> = 5.8, 8.4 Hz), 7.14 – 7.00 (2H, m), 4.91 – 4.66 (2H, m), 3.24 – 2.88 (2H, m), 2.79 – 2.50 (4H, m), 2.45 (3H, s), 1.79 – 1.52 (4H, m), 1.54 – 1.37 (2H, m).                                         | 340.1937 (1.49) |

|            |     |       |   |           |                                                                                                                                                                                                                                                                                                                                                                                                     |                 |
|------------|-----|-------|---|-----------|-----------------------------------------------------------------------------------------------------------------------------------------------------------------------------------------------------------------------------------------------------------------------------------------------------------------------------------------------------------------------------------------------------|-----------------|
| <b>10o</b> | 100 | 2.20  | 1 | Free Base | <sup>1</sup> H NMR (300 MHz, CD <sub>3</sub> OD) δ 9.05 (1H, s), 8.27 (1H, d, <i>J</i> = 4.1 Hz), 7.98 (1H, t, <i>J</i> = 8.1 Hz), 7.57 – 7.40 (2H, m), 4.70 (2H, t, <i>J</i> = 6.9 Hz), 2.93 (2H, t, <i>J</i> = 6.7 Hz), 2.54 (4H, t, <i>J</i> = 4.6 Hz), 1.64 – 1.48 (4H, m), 1.48 – 1.35 (2H, m).                                                                                                | 360.1389 (1.05) |
| <b>10p</b> | 98  | 2.11  | 1 | Free Base | <sup>1</sup> H NMR (300 MHz, CDCl <sub>3</sub> ) δ 9.07 (1H, s), 7.92 (1H, s), 7.73 – 7.50 (2H, m), 7.42 (1H, td, <i>J</i> = 2.6, 8.4 Hz), 5.07 – 4.64 (2H, m), 3.38 – 2.90 (2H, m), 2.78 – 2.43 (4H, m), 1.87 – 1.54 (4H, m), 1.54 – 1.30 (2H, m).                                                                                                                                                 | 394.1653 (0.95) |
| <b>10q</b> | 100 | 2.03  | 1 | Free Base | <sup>1</sup> H NMR (400 MHz, CD <sub>3</sub> OD) δ 9.02 (1H, s), 8.03 (1H, s), 8.00 – 7.92 (1H, m), 7.88 – 7.75 (2H, m), 7.65 (1H, ddt, <i>J</i> = 0.7, 1.5, 7.8 Hz), 4.72 (2H, t, <i>J</i> = 6.7 Hz), 2.94 (2H, t, <i>J</i> = 6.7 Hz), 2.60 – 2.44 (4H, m), 1.53 (4H, p, <i>J</i> = 5.5 Hz), 1.48 – 1.36 (2H, m).                                                                                  | 376.1748 (1.2)  |
| <b>11a</b> | 96  | 12.56 | 4 | Free Base | <sup>1</sup> H NMR (400 MHz, CDCl <sub>3</sub> ) δ 9.43 (1H, d, <i>J</i> = 1.6 Hz), 9.09 (1H, s), 8.81 (1H, dd, <i>J</i> = 1.7, 4.8 Hz), 8.53 (1H, dt, <i>J</i> = 2.0, 8.0 Hz), 8.37 (1H, s), 7.54 (1H, ddd, <i>J</i> = 0.9, 4.8, 8.0 Hz), 4.69 (2H, t, <i>J</i> = 7.0 Hz), 2.92 (2H, t, <i>J</i> = 7.0 Hz), 2.50 (4H, t, <i>J</i> = 5.2 Hz), 1.52 (4H, p, <i>J</i> = 5.5 Hz), 1.46 – 1.34 (2H, m). | 309.1828 (1.73) |
| <b>11b</b> | 95  | 12.55 | 4 | Free Base | <sup>1</sup> H NMR (250 MHz, CDCl <sub>3</sub> ) δ 9.09 (1H, s), 8.68 (1H, dd, <i>J</i> = 1.8, 4.9 Hz), 7.98 (1H, s), 7.85 (1H, dd, <i>J</i> = 1.8, 7.7 Hz), 7.33 (1H, dd, <i>J</i> = 4.9, 7.8 Hz), 4.68 (2H, t, <i>J</i> = 7.1 Hz), 2.91 (2H, t, <i>J</i> = 7.1 Hz), 2.65 (3H, s), 2.50 (4H, t, <i>J</i> = 5.0 Hz), 1.52 (4H, p, <i>J</i> = 5.5 Hz), 1.47 – 1.35 (2H, m).                          | 323.1983 (1.36) |

|            |    |       |   |           |                                                                                                                                                                                                                                                                                                                                        |                  |
|------------|----|-------|---|-----------|----------------------------------------------------------------------------------------------------------------------------------------------------------------------------------------------------------------------------------------------------------------------------------------------------------------------------------------|------------------|
| <b>11c</b> | 98 | 12.07 | 4 | HCl       | <sup>1</sup> H NMR (250 MHz, CD <sub>3</sub> OD) δ 9.18 (1H, s), 9.10 (1H, s), 8.89 (1H, d, <i>J</i> = 7.0 Hz), 8.41 (1H, s), 7.86 (1H, d, <i>J</i> = 6.9 Hz), 5.03 (2H, t, <i>J</i> = 6.0 Hz), 4.26 (3H, s), 3.90 – 3.70 (4H, m), 3.10 (2H, t, <i>J</i> = 12.1 Hz), 2.11 – 1.69 (5H, m), 1.66 – 1.45 (1H, m).                         | 339.1933 (-1.66) |
| <b>11d</b> | 97 | 12.75 | 4 | HCl       | <sup>1</sup> H NMR (250 MHz, CD <sub>3</sub> OD) δ 9.23 (1H, s), 9.14 (1H, s), 8.92 (1H, d, <i>J</i> = 6.1 Hz), 8.45 (1H, s), 8.21 (1H, d, <i>J</i> = 6.1 Hz), 5.06 (2H, t, <i>J</i> = 5.9 Hz), 3.97 – 3.75 (4H, m), 3.10 (2H, t, <i>J</i> = 12.0 Hz), 2.78 (3H, s), 2.12 – 1.69 (5H, m), 1.69 – 1.48 (1H, m).                         | 323.1983 (1.46)  |
| <b>11e</b> | 97 | 14.24 | 4 | Free Base | <sup>1</sup> H NMR (250 MHz, CDCl <sub>3</sub> ) δ 9.21 (1H, d, <i>J</i> = 2.2 Hz), 9.08 (1H, s), 8.64 (1H, d, <i>J</i> = 2.2 Hz), 8.37 (1H, s), 8.33 (1H, t, <i>J</i> = 2.2 Hz), 4.68 (2H, t, <i>J</i> = 7.0 Hz), 2.91 (2H, t, <i>J</i> = 7.0 Hz), 2.65 – 2.41 (7H, m), 1.52 (4H, p, <i>J</i> = 5.0 Hz), 1.47 – 1.32 (2H, m).         | 323.1985 (2.00)  |
| <b>11f</b> | 99 | 14.41 | 4 | Free Base | <sup>1</sup> H NMR (250 MHz, CDCl <sub>3</sub> ) δ 9.06 (1H, s), 8.36 (1H, d, <i>J</i> = 4.5 Hz), 8.19 (1H, d, <i>J</i> = 7.4 Hz), 8.14 (1H, s), 7.11 (1H, dd, <i>J</i> = 4.9, 7.5 Hz), 4.66 (2H, t, <i>J</i> = 7.2 Hz), 4.04 (3H, s), 2.91 (2H, t, <i>J</i> = 7.3 Hz), 2.61 – 2.41 (4H, m), 1.66 – 1.48 (4H, m), 1.48 – 1.33 (2H, m). | 339.1934 (1.85)  |
| <b>11g</b> | 99 | 14.92 | 4 | Free Base | <sup>1</sup> H NMR (250 MHz, CDCl <sub>3</sub> ) δ 9.42 (1H, s), 9.20 (1H, s), 8.90 (1H, s), 8.40 (1H, d, <i>J</i> = 8.2 Hz), 8.21 – 8.04 (2H, m), 7.91 – 7.63 (2H, m), 4.72 (2H, t, <i>J</i> = 7.1 Hz), 2.95 (2H, t, <i>J</i> = 7.1 Hz), 2.53 (4H, t, <i>J</i> = 5.2 Hz), 1.63 – 1.47 (4H, m), 1.47 – 1.38 (2H, m).                   | 359.1984 (1.45)  |



|            |     |       |   |           |                                                                                                                                                                                                                                                                                                                                                                                         |                 |
|------------|-----|-------|---|-----------|-----------------------------------------------------------------------------------------------------------------------------------------------------------------------------------------------------------------------------------------------------------------------------------------------------------------------------------------------------------------------------------------|-----------------|
| <b>11h</b> | 100 | 19.23 | 2 | Free Base | <sup>1</sup> H NMR (400 MHz, CDCl <sub>3</sub> ) δ 9.07 (1H, s), 8.95 (1H, s), 8.88 – 8.84 (1H, m), 8.63 (1H, dt, <i>J</i> = 1.1, 7.9 Hz), 7.91 (1H, td, <i>J</i> = 1.8, 7.7 Hz), 7.46 (1H, ddd, <i>J</i> = 1.3, 4.7, 7.5 Hz), 4.68 (2H, t, <i>J</i> = 7.1 Hz), 2.92 (2H, t, <i>J</i> = 7.0 Hz), 2.50 (4H, t, <i>J</i> = 5.3 Hz), 1.51 (4H, p, <i>J</i> = 5.5 Hz), 1.46 – 1.31 (2H, m). | 309.1829 (2.27) |
| <b>11i</b> | 99  | 17.37 | 4 | Free Base | <sup>1</sup> H NMR (250 MHz, CDCl <sub>3</sub> ) δ 9.05 (1H, s), 8.98 (1H, s), 8.41 (1H, d, <i>J</i> = 7.9 Hz), 7.79 (1H, t, <i>J</i> = 7.8 Hz), 7.31 (1H, d, <i>J</i> = 8.1 Hz), 4.67 (2H, t, <i>J</i> = 7.0 Hz), 2.90 (6H, t, <i>J</i> = 6.7 Hz), 2.72 (3H, s), 2.63 – 2.41 (4H, m), 1.66 – 1.45 (4H, m), 1.45 – 1.31 (2H, m).                                                        | 323.1984 (1.6)  |
| <b>11j</b> | 100 | 1.47  | 1 | Free Base | <sup>1</sup> H NMR (300 MHz, CD <sub>3</sub> OD) δ 9.11 (1H, s), 8.83 (2H, d, <i>J</i> = 6.2 Hz), 8.65 (1H, s), 8.26 (2H, d, <i>J</i> = 6.2 Hz), 4.73 (2H, t, <i>J</i> = 6.7 Hz), 2.95 (2H, t, <i>J</i> = 6.7 Hz), 2.54 (4H, t, <i>J</i> = 5.4 Hz), 1.53 (4H, p, <i>J</i> = 5.8 Hz), 1.49 – 1.36 (2H, m).                                                                               | 309.1828 (2.03) |
| <b>12a</b> | 95  | 1.59  | 1 | Free Base | <sup>1</sup> H NMR (300 MHz, CDCl <sub>3</sub> ) δ 9.52 (1H, s), 9.33 (1H, s), 9.03 (1H, s), 8.34 (1H, s), 4.90 – 4.61 (2H, m), 3.15 – 2.83 (2H, m), 2.73 – 2.37 (4H, m), 1.77 – 1.49 (4H, m), 1.51 – 1.33 (2H, m).                                                                                                                                                                     | 315.1393 (1.96) |
| <b>12b</b> | 99  | 1.84  | 1 | Free Base | <sup>1</sup> H NMR (300 MHz, CD <sub>3</sub> OD) δ 8.81 (1H, dd, <i>J</i> = 0.7, 2.8 Hz), 8.77 (1H, s), 8.68 (1H, s), 7.99 (1H, dd, <i>J</i> = 0.7, 1.6 Hz), 6.65 (1H, dd, <i>J</i> = 1.6, 2.8 Hz), 4.67 (2H, t, <i>J</i> = 6.8 Hz), 2.92 (2H, t, <i>J</i> = 6.8 Hz), 2.53 (4H, t, <i>J</i> = 5.3 Hz), 1.54 (4H, p, <i>J</i> = 5.5 Hz), 1.49 – 1.34 (2H, m).                            | 298.1781 (2.11) |

|            |     |       |   |           |                                                                                                                                                                                                                                                                                                                              |                 |
|------------|-----|-------|---|-----------|------------------------------------------------------------------------------------------------------------------------------------------------------------------------------------------------------------------------------------------------------------------------------------------------------------------------------|-----------------|
| <b>12c</b> | 98  | 1.35  | 1 | Free Base | <sup>1</sup> H NMR (300 MHz, CD <sub>3</sub> OD) δ 8.83 (1H, d, <i>J</i> = 1.4 Hz), 8.63 (1H, s), 8.58 (1H, d, <i>J</i> = 1.4 Hz), 8.37 (1H, s), 4.65 (2H, t, <i>J</i> = 6.9 Hz), 4.03 (3H, s), 2.91 (2H, t, <i>J</i> = 6.8 Hz), 2.61 – 2.47 (4H, m), 1.54 (4H, p, <i>J</i> = 5.5, 6.0 Hz), 1.48 – 1.35 (2H, m).             | 312.1936 (1.66) |
| <b>12d</b> | 100 | 1.62  | 1 | Free Base | <sup>1</sup> H NMR (300 MHz, CD <sub>3</sub> OD) δ 8.82 (1H, s), 8.65 (1H, s), 8.61 (1H, s), 8.40 (1H, s), 4.67 (1H, hept, <i>J</i> = 6.8 Hz), 4.66 (2H, t, <i>J</i> = 7.0 Hz), 2.92 (2H, t, <i>J</i> = 6.8 Hz), 2.53 (4H, t, <i>J</i> = 4.8 Hz), 1.59 (6H, d, <i>J</i> = 6.7 Hz), 1.57 – 1.49 (4H, m), 1.49 – 1.38 (2H, m). | 340.2251 (1.92) |
| <b>12e</b> | 95  | 13.84 | 4 | HCl       | <sup>1</sup> H NMR (250 MHz, CDCl <sub>3</sub> ) δ 12.71 (1H, br s), 9.10 (1H, s), 8.11 (1H, s), 5.24 – 5.07 (2H, m), 3.86 – 3.51 (4H, m), 2.87 – 2.66 (2H, m), 2.63 (3H, s), 2.47 (3H, s), 2.41 – 2.21 (2H, m), 1.97 – 1.80 (2H, m), 1.50 – 1.26 (2H, m).                                                                   | 327.1936 (2.38) |
| <b>12f</b> | 99  | 15.20 | 6 | Free Base | <sup>1</sup> H NMR (400 MHz, CDCl <sub>3</sub> ) δ 9.03 (1H, s), 8.24 (1H, s), 7.64 (1H, d, <i>J</i> = 2.1 Hz), 7.01 (1H, d, <i>J</i> = 2.1 Hz), 4.66 (2H, t, <i>J</i> = 7.0 Hz), 4.38 (3H, s), 2.90 (2H, t, <i>J</i> = 7.0 Hz), 2.49 (4H, t, <i>J</i> = 5.2 Hz), 1.57 – 1.46 (4H, m), 1.45 – 1.36 (2H, m).                  | 312.1938 (2.24) |
| <b>12g</b> | 95  | 2.17  | 1 | Free Base | <sup>1</sup> H NMR (300 MHz, CDCl <sub>3</sub> ) δ 9.07 (1H, s), 8.25 (1H, s), 7.22 (1H, s), 4.73 (2H, t, <i>J</i> = 6.4 Hz), 4.42 (3H, s), 3.09 – 2.84 (2H, m), 2.73 – 2.32 (4H, m), 1.71 – 1.49 (4H, m), 1.49 – 1.29 (2H, m).                                                                                              | 380.1809 (1.06) |
| <b>12h</b> | 98  | 1.89  | 1 | Free Base | <sup>1</sup> H NMR (300 MHz, CDCl <sub>3</sub> ) δ 8.88 (1H, s), 8.26 (1H, s), 7.11 (1H, dd, <i>J</i> = 1.7, 4.0 Hz), 6.92 (1H, t, <i>J</i> = 2.1 Hz), 6.32 (1H, dd, <i>J</i> = 2.6, 4.0 Hz), 4.81 – 4.60 (2H, m), 4.16 (3H, s), 3.16 – 2.93 (2H, m), 2.74 – 2.46                                                            | 311.1986 (2.34) |

|            |     |      |   |           |                                                                                                                                                                                                                                                                                                                                                             |                 |
|------------|-----|------|---|-----------|-------------------------------------------------------------------------------------------------------------------------------------------------------------------------------------------------------------------------------------------------------------------------------------------------------------------------------------------------------------|-----------------|
|            |     |      |   |           | (4H, m), 1.76 – 1.54 (4H, m), 1.54 – 1.35 (2H, m).                                                                                                                                                                                                                                                                                                          |                 |
| <b>12i</b> | 100 | 1.40 | 1 | Free Base | <sup>1</sup> H NMR (300 MHz, CD <sub>3</sub> OD) δ 8.95 (1H, s), 8.49 (1H, s), 8.07 (1H, d, <i>J</i> = 1.0 Hz), 7.94 (1H, s), 4.67 (2H, t, <i>J</i> = 6.8 Hz), 4.19 (3H, s), 2.92 (2H, t, <i>J</i> = 6.8 Hz), 2.53 (4H, t, <i>J</i> = 5.2 Hz), 1.54 (4H, p, <i>J</i> = 5.4, 5.9 Hz), 1.50 – 1.35 (2H, m).                                                   | 312.1935 (-1.4) |
| <b>12j</b> | 95  | 1.27 | 1 | Free Base | <sup>1</sup> H NMR (300 MHz, CD <sub>3</sub> OD) δ 8.82 (1H, d, <i>J</i> = 1.3 Hz), 8.74 (1H, d, <i>J</i> = 1.4 Hz), 8.11 (1H, s), 7.85 (1H, s), 4.65 (2H, t, <i>J</i> = 6.8 Hz), 3.86 (3H, d, <i>J</i> = 1.3 Hz), 2.94 (2H, t, <i>J</i> = 6.8 Hz), 2.65 – 2.44 (4H, m), 1.68 – 1.49 (4H, m), 1.49 – 1.32 (2H, m).                                          | 312.1934 (0.82) |
| <b>12k</b> | 99  | 2.96 | 5 | Free Base | <sup>1</sup> H NMR (300 MHz, CD <sub>3</sub> OD) δ 8.82 (1H, d, <i>J</i> = 1.3 Hz), 8.61 (1H, d, <i>J</i> = 0.9 Hz), 8.10 (1H, dd, <i>J</i> = 0.9, 4.3 Hz), 7.20 (1H, dd, <i>J</i> = 1.3, 4.2 Hz), 4.66 (2H, t, <i>J</i> = 6.7 Hz), 2.92 (2H, t, <i>J</i> = 6.7 Hz), 2.53 (4H, t, <i>J</i> = 5.3 Hz), 1.53 (4H, p, <i>J</i> = 5.4 Hz), 1.48 – 1.29 (2H, m). | 348.1049 (1.51) |
| <b>12l</b> | 98  | 1.46 | 1 | Free Base | <sup>1</sup> H NMR (300 MHz, CDCl <sub>3</sub> ) δ 9.12 (1H, s), 8.71 (1H, s), 8.09 – 7.88 (1H, m), 7.60 – 7.39 (1H, m), 5.06 – 4.68 (2H, m), 3.10 (2H, s), 2.76 – 2.35 (4H, m), 1.86 – 1.52 (4H, m), 1.52 – 1.32 (2H, m).                                                                                                                                  | 299.1620 (1.76) |
| <b>12m</b> | 98  | 1.87 | 1 | Free Base | <sup>1</sup> H NMR (300 MHz, CDCl <sub>3</sub> ) δ 9.01 (1H, s), 8.82 (1H, s), 8.16 (1H, d, <i>J</i> = 3.1 Hz), 7.65 (1H, d, <i>J</i> = 3.1 Hz), 4.76 (2H, t, <i>J</i> = 6.0 Hz), 3.26 – 2.91 (2H, m), 2.85 – 2.41 (4H, m), 1.84 – 1.52 (4H, m), 1.52 – 1.31 (2H, m).                                                                                       | 315.1395 (2.7)  |

|            |    |      |   |              |                                                                                                                                                                                                                                                                                                                                                |                 |
|------------|----|------|---|--------------|------------------------------------------------------------------------------------------------------------------------------------------------------------------------------------------------------------------------------------------------------------------------------------------------------------------------------------------------|-----------------|
| <b>13a</b> | 95 | 1.98 | 1 | Free<br>Base | <sup>1</sup> H NMR (300 MHz, CD <sub>3</sub> OD) δ 9.05 (1H, d, <i>J</i> = 1.5 Hz), 8.13 (1H, d, <i>J</i> = 1.5 Hz), 7.76 – 7.47 (4H, m), 4.70 (2H, td, <i>J</i> = 1.6, 6.3 Hz), 3.00 (2H, td, <i>J</i> = 1.4, 6.2 Hz), 2.66 (4H, t, <i>J</i> = 5.7 Hz), 1.83 (4H, tt, <i>J</i> = 5.6, 12.9 Hz).                                               | 378.1297 (1.54) |
| <b>13b</b> | 95 | 2.05 | 1 | Free<br>Base | <sup>1</sup> H NMR (300 MHz, CD <sub>3</sub> OD) δ 9.05 (1H, s), 8.16 (1H, s), 7.72 (1H, dd, <i>J</i> = 6.0, 8.6 Hz), 7.51 (1H, dd, <i>J</i> = 2.5, 8.7 Hz), 7.34 (1H, td, <i>J</i> = 2.5, 8.3 Hz), 4.70 (2H, t, <i>J</i> = 6.3 Hz), 3.00 (2H, t, <i>J</i> = 6.3 Hz), 2.66 (4H, t, <i>J</i> = 5.6 Hz), 1.83 (4H, tt, <i>J</i> = 5.6, 13.2 Hz). | 396.1201 (0.98) |

---

# Representative Spectra

## Spectra of Compound 5

### <sup>1</sup>H-NMR spectrum

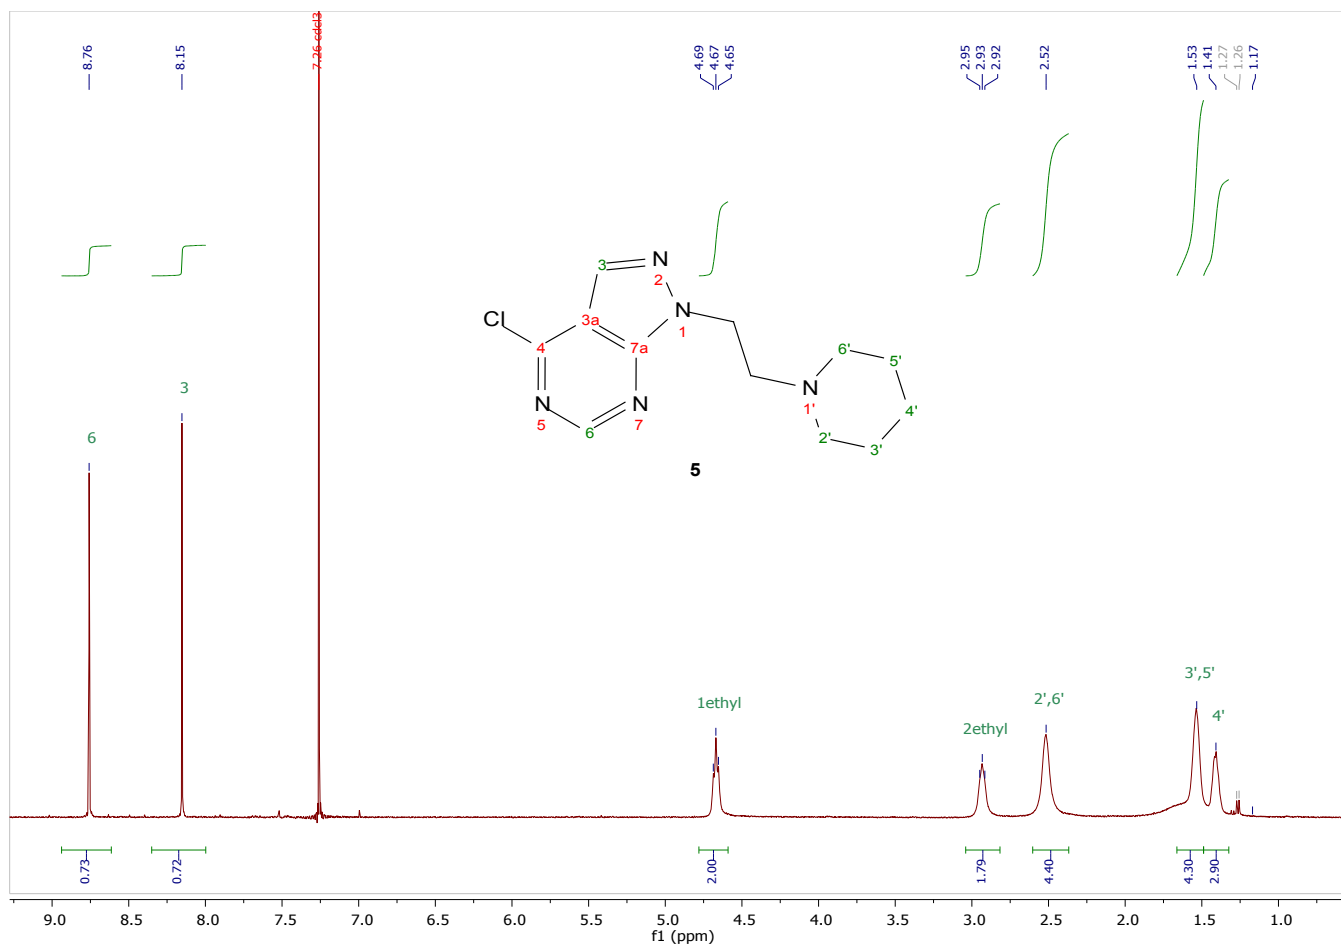

### MS Spectrum

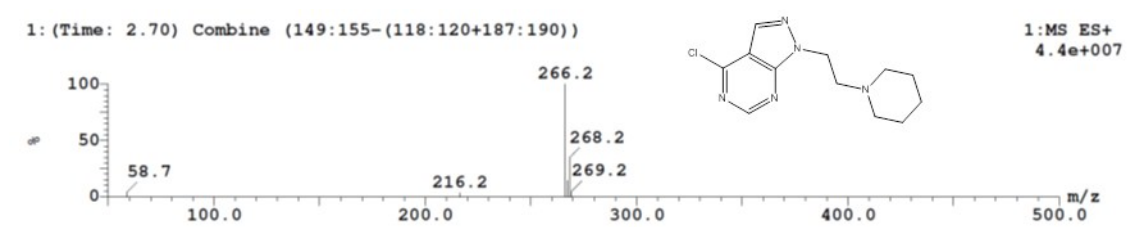

### PDA Chromatogram

3: UV Detector: 210\_320 1.1000-3.8200: Smooth (Mn, 2x3), 3.8900-5.5000: Smooth (Mn, 2x3) 1.829e+1  
Range: 1.839e+1

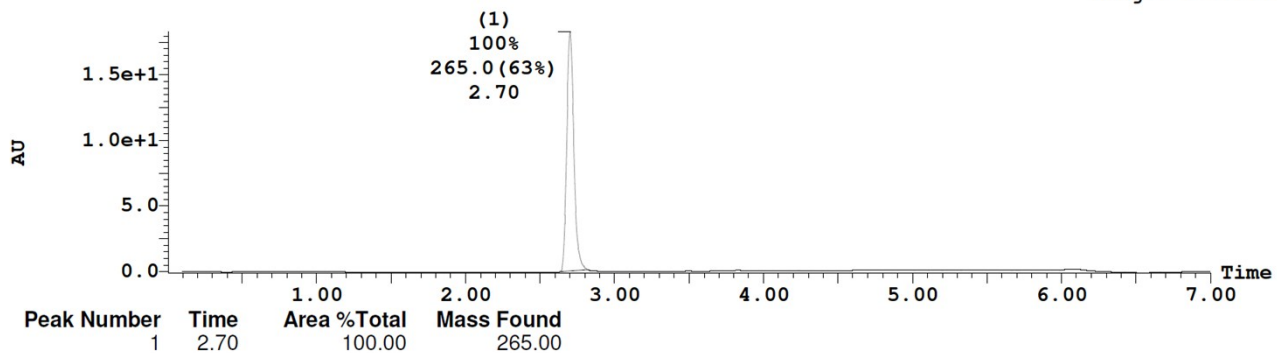

## Spectra of Compound 8

### <sup>1</sup>H-NMR spectrum

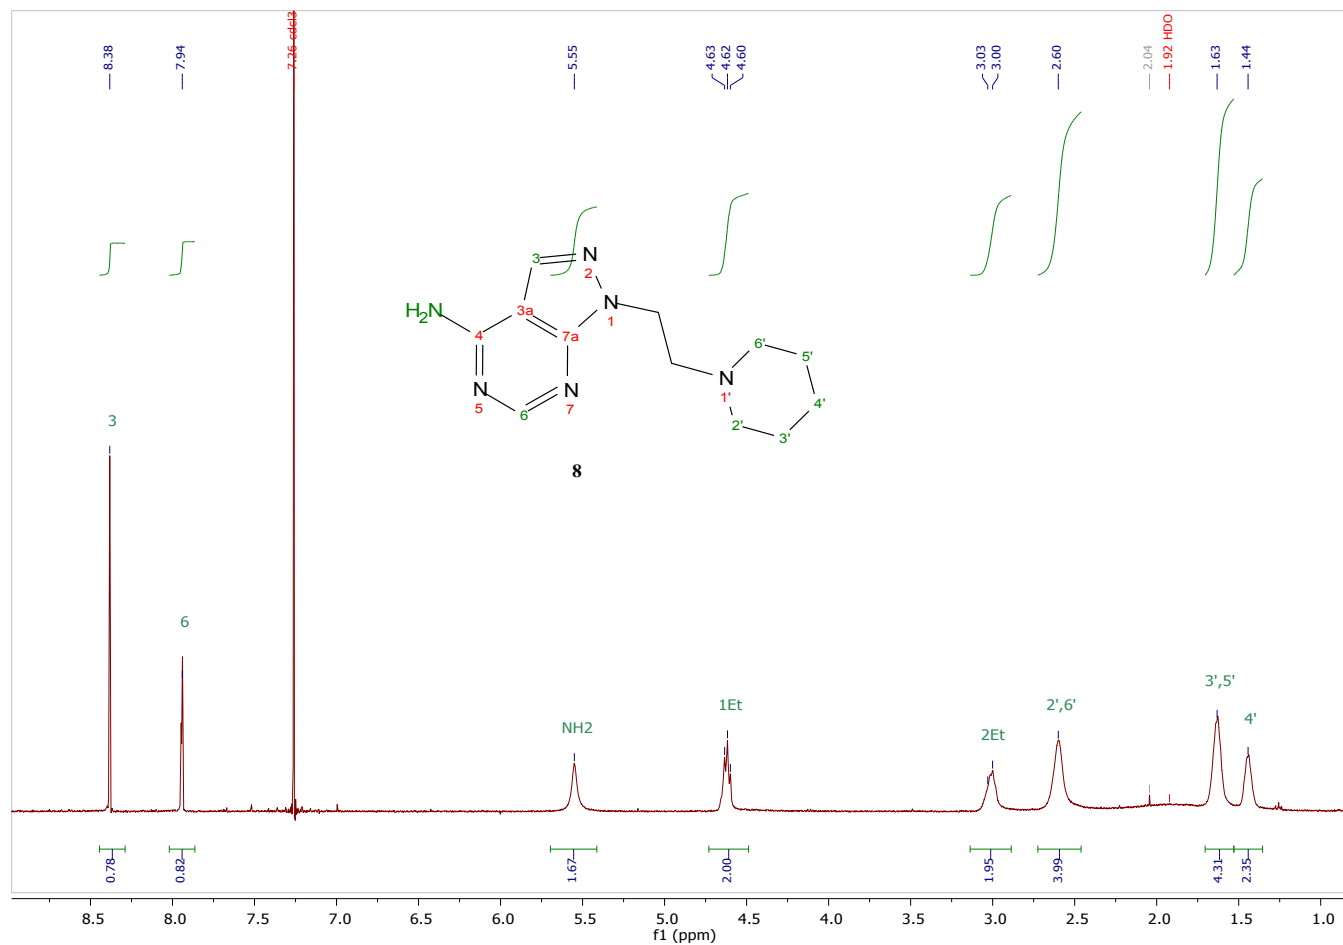

## MS Spectrum

2: (Time: 2.29)

1.2e+07

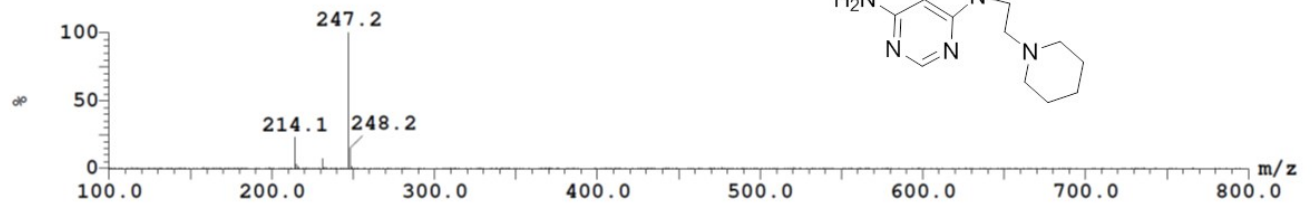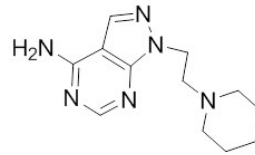

## PDA Chromatogram

3: UV Detector: 210\_320

8.004

Range: 8.003

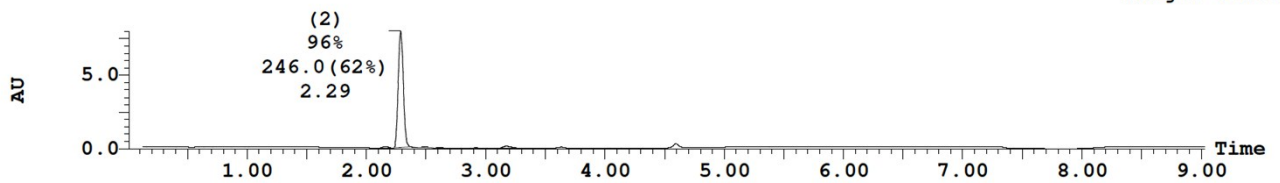

| Peak Number | Time | Area %Total | Mass Found |
|-------------|------|-------------|------------|
| 1           | 2.16 | 1.12        |            |
| 2           | 2.29 | 95.67       | 246.00     |
| 4           | 2.49 | 0.78        | 246.00     |
| 5           | 3.17 | 2.43        |            |

## Spectra of Compound 9b

### <sup>1</sup>H-NMR spectrum

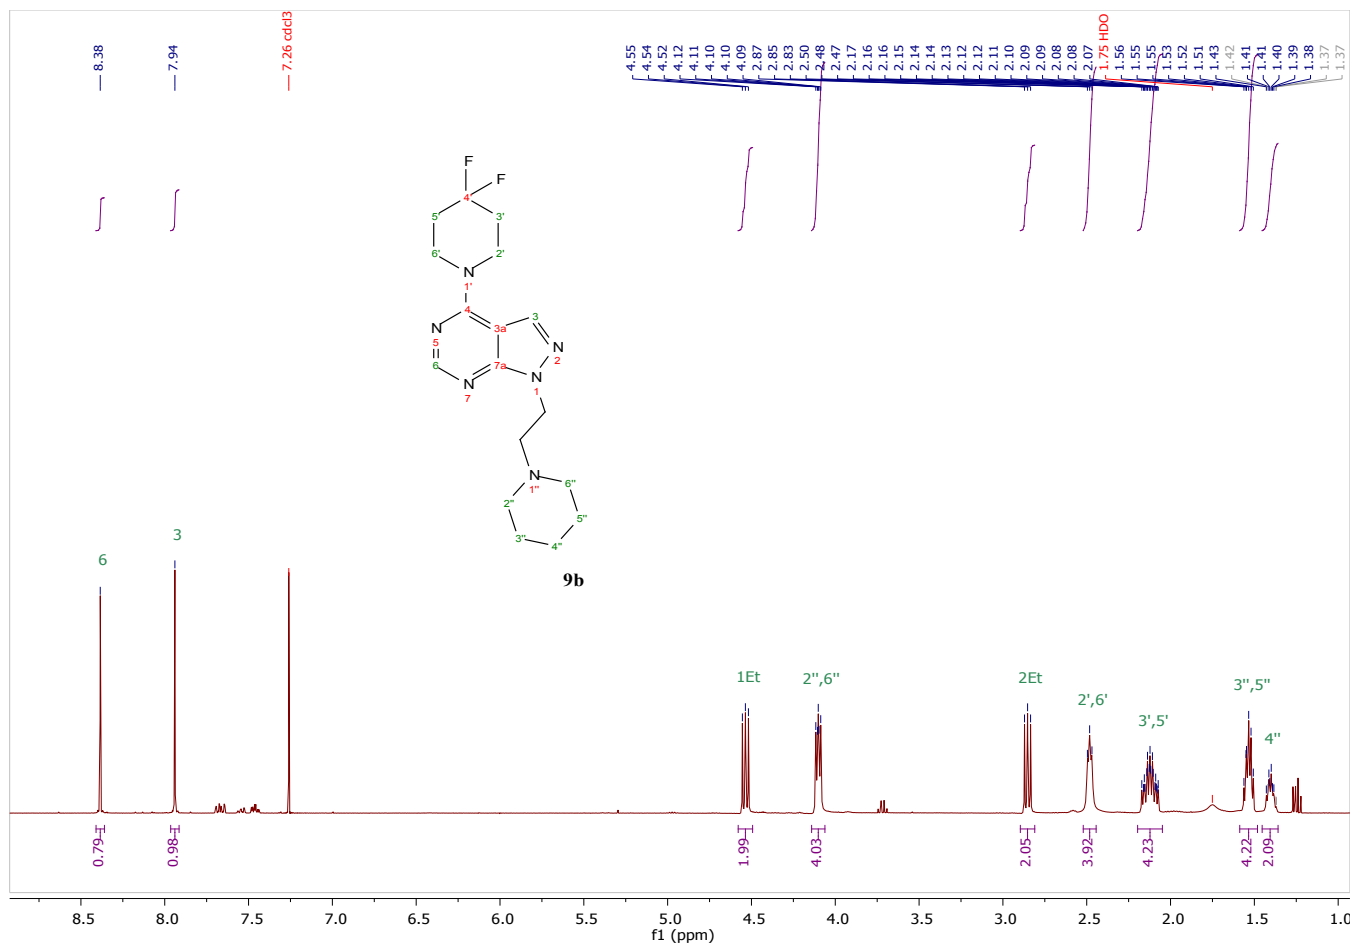

<sup>13</sup>C-NMR spectrum



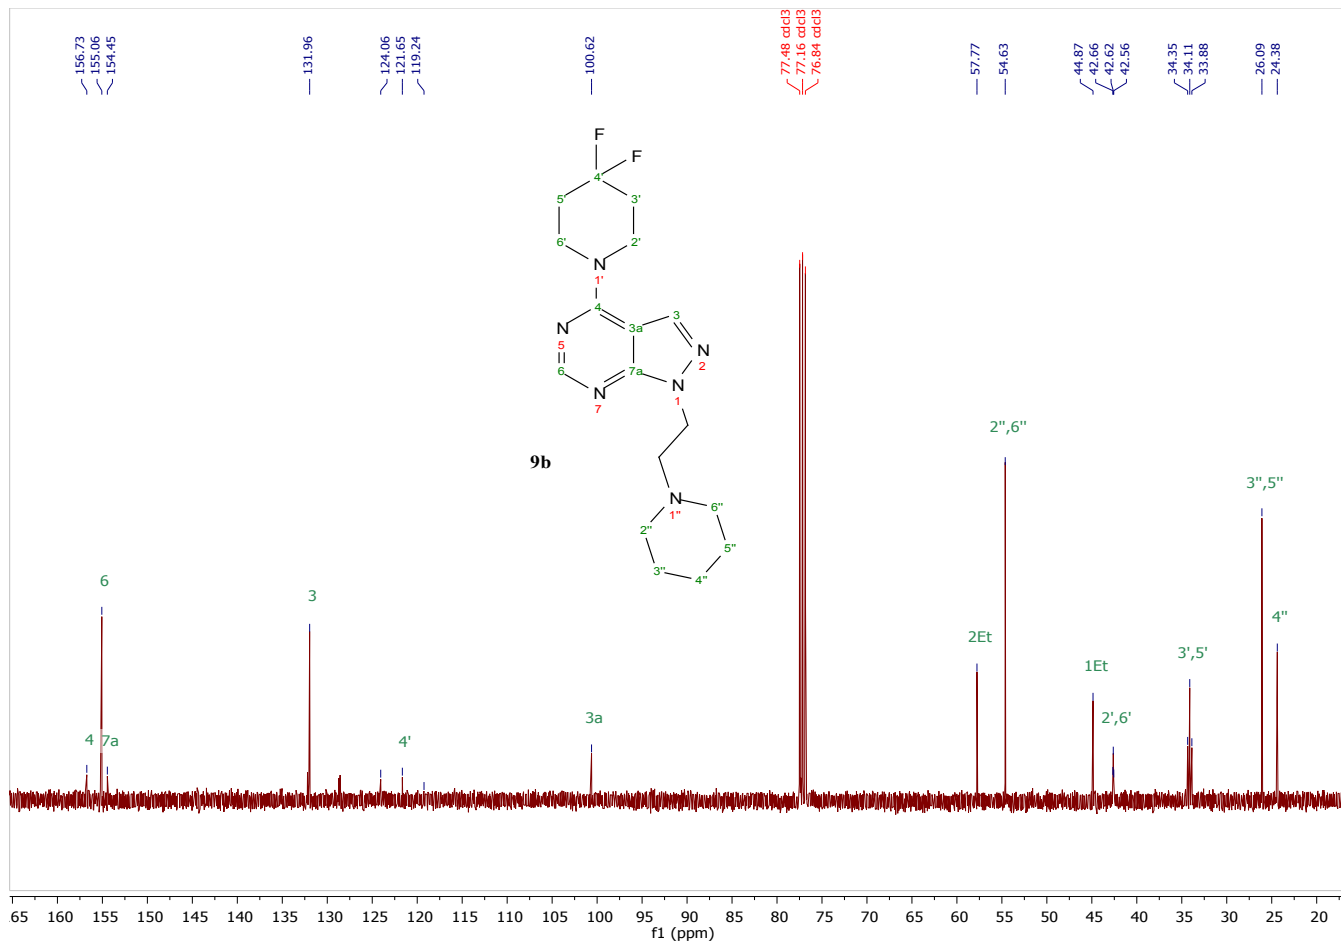

## HRMS Spectrum

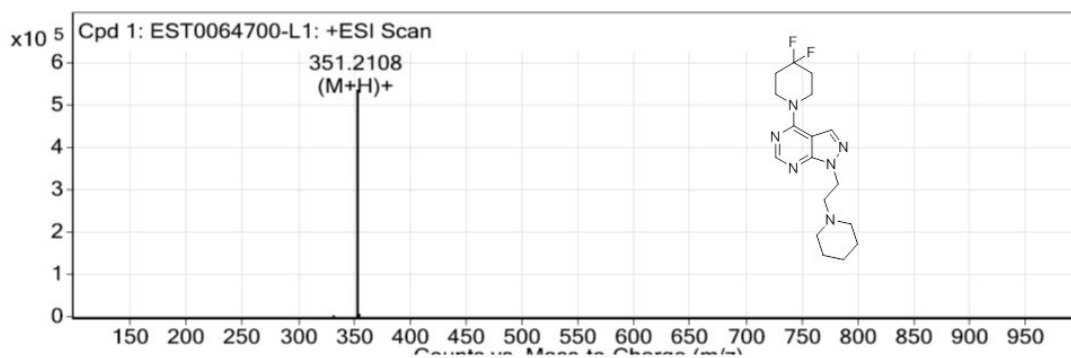

## PDA Chromatogram

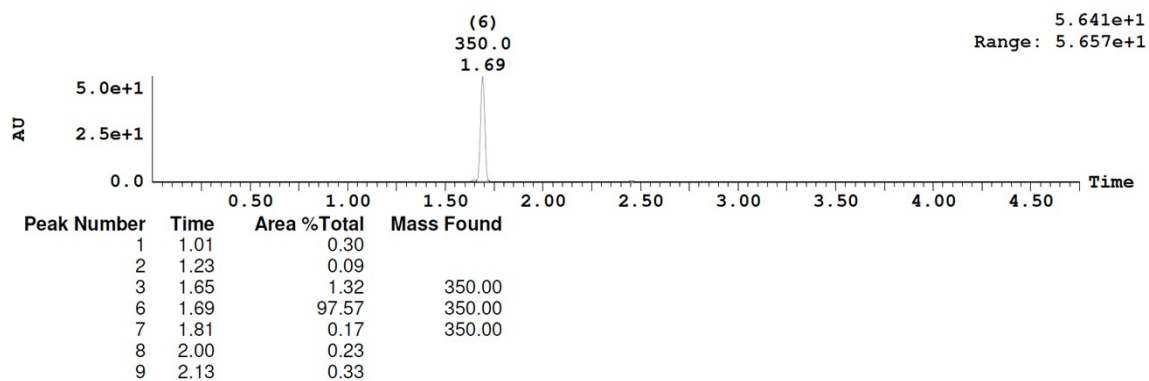

## Spectra of Compound 9f

### <sup>1</sup>H-NMR spectrum

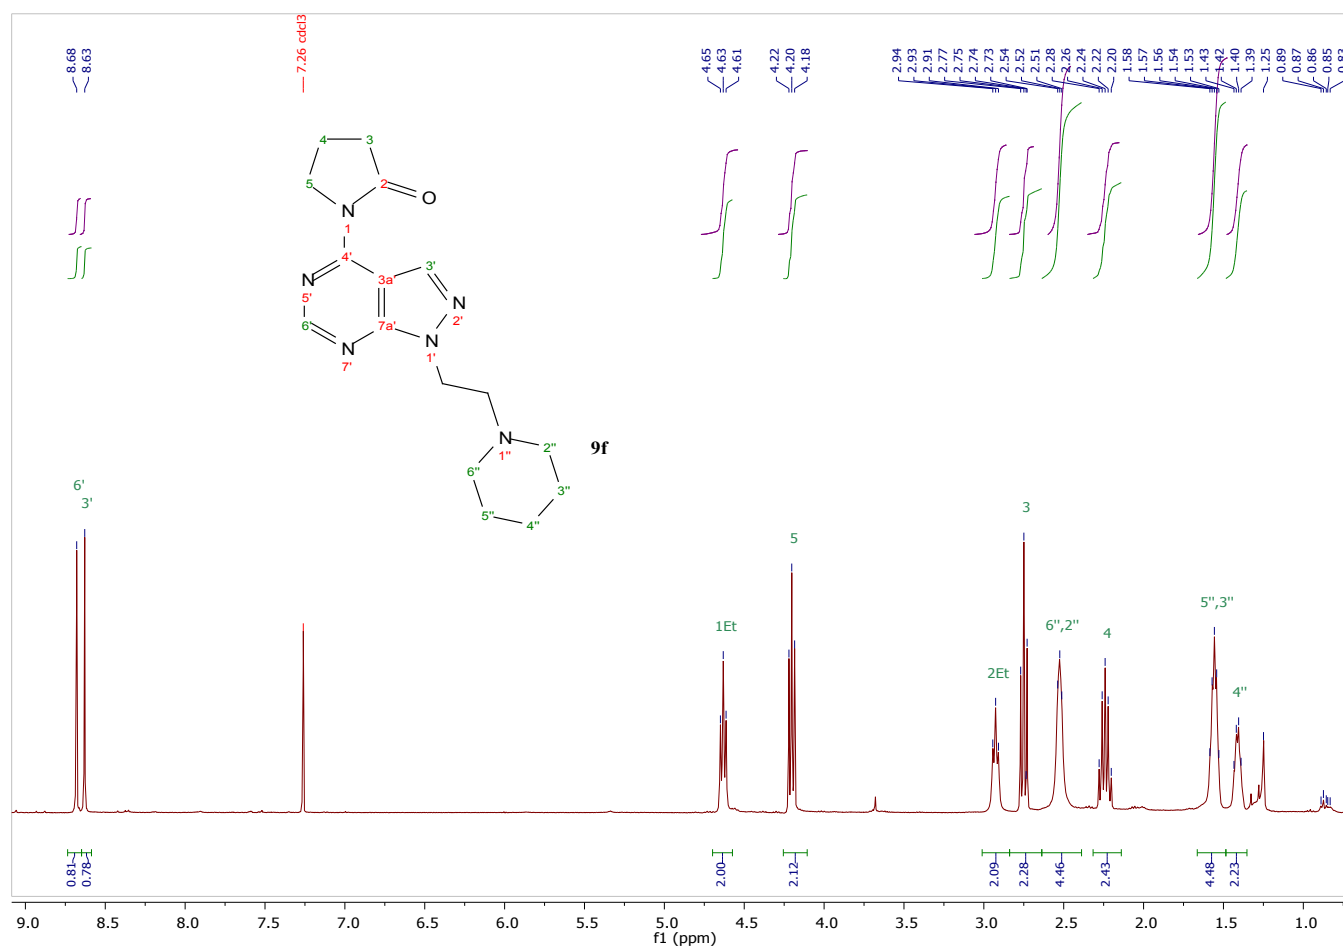

### <sup>13</sup>C-NMR spectrum

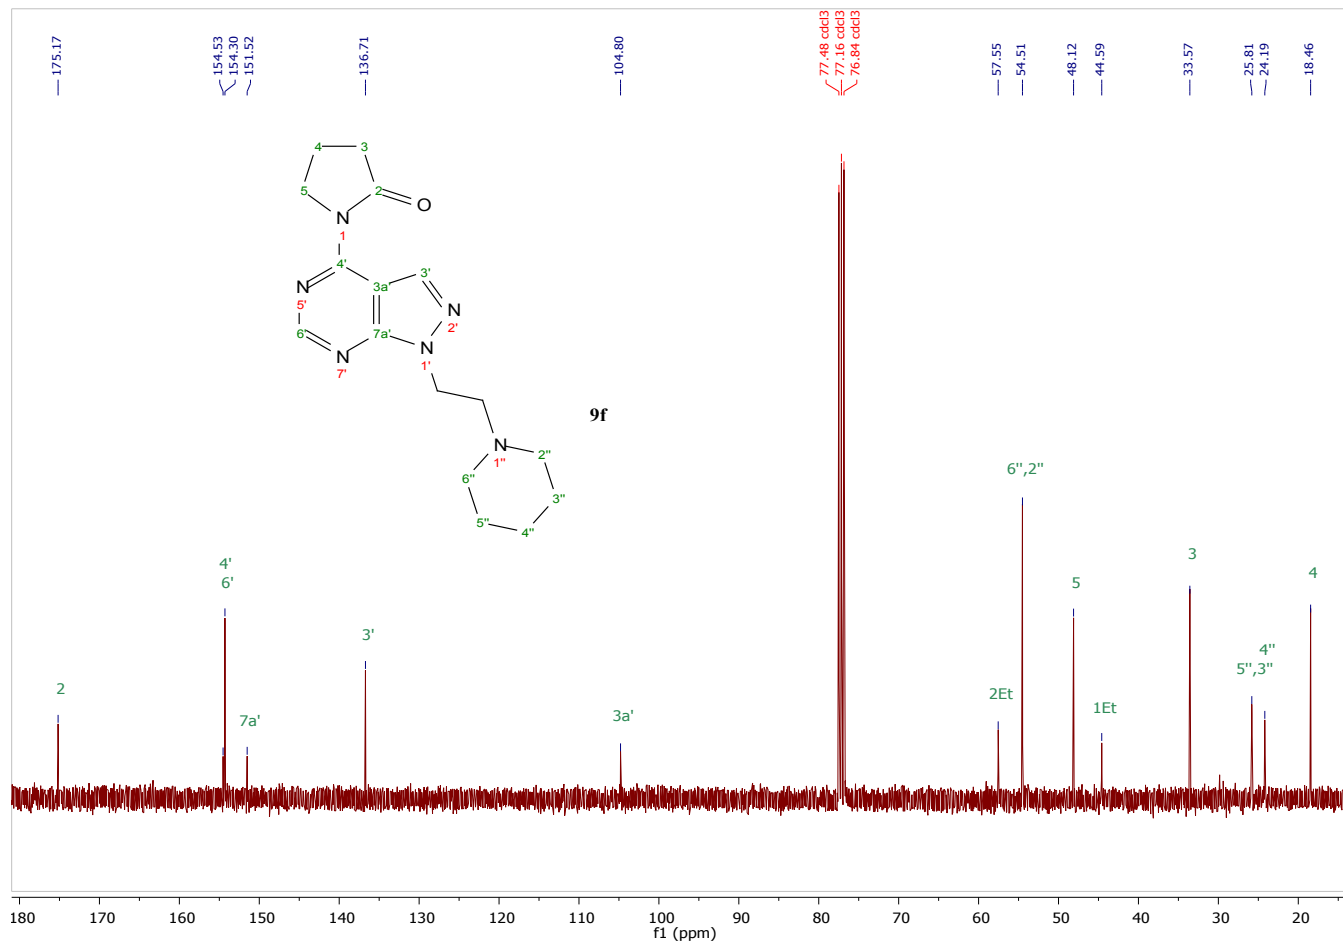

### HRMS Spectrum

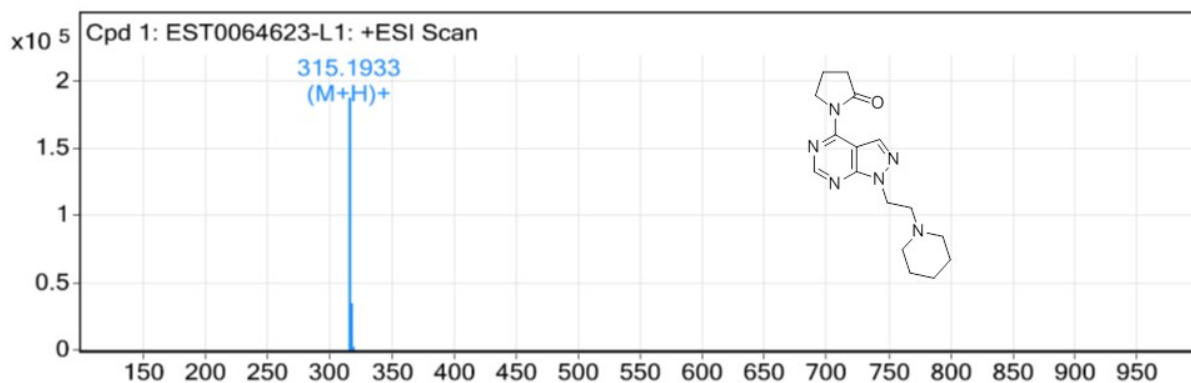

## PDA Chromatogram

3: UV Detector: 210\_320 0.7500-2.4300: Smooth (Mn, 2x3), 2.4800-3.1000: Smooth (Mn, 1x2) 7.765e+1  
Range: 7.781e+1

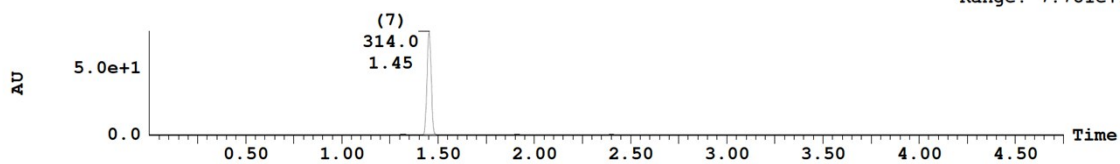

| Peak Number | Time | Area %Total | Mass Found |
|-------------|------|-------------|------------|
| 1           | 0.88 | 0.13        |            |
| 2           | 0.92 | 0.38        |            |
| 3           | 1.03 | 0.35        |            |
| 4           | 1.32 | 1.11        |            |
| 7           | 1.45 | 96.21       | 314.00     |
| 8           | 1.56 | 0.15        | 314.00     |
| 9           | 1.65 | 0.09        | 314.00     |
| 10          | 1.68 | 0.13        | 314.00     |
| 11          | 1.91 | 0.75        |            |
| 12          | 2.09 | 0.12        |            |
| 13          | 2.20 | 0.09        |            |
| 14          | 2.40 | 0.50        |            |

## Spectra of Compound 9g

### <sup>1</sup>H-NMR spectrum

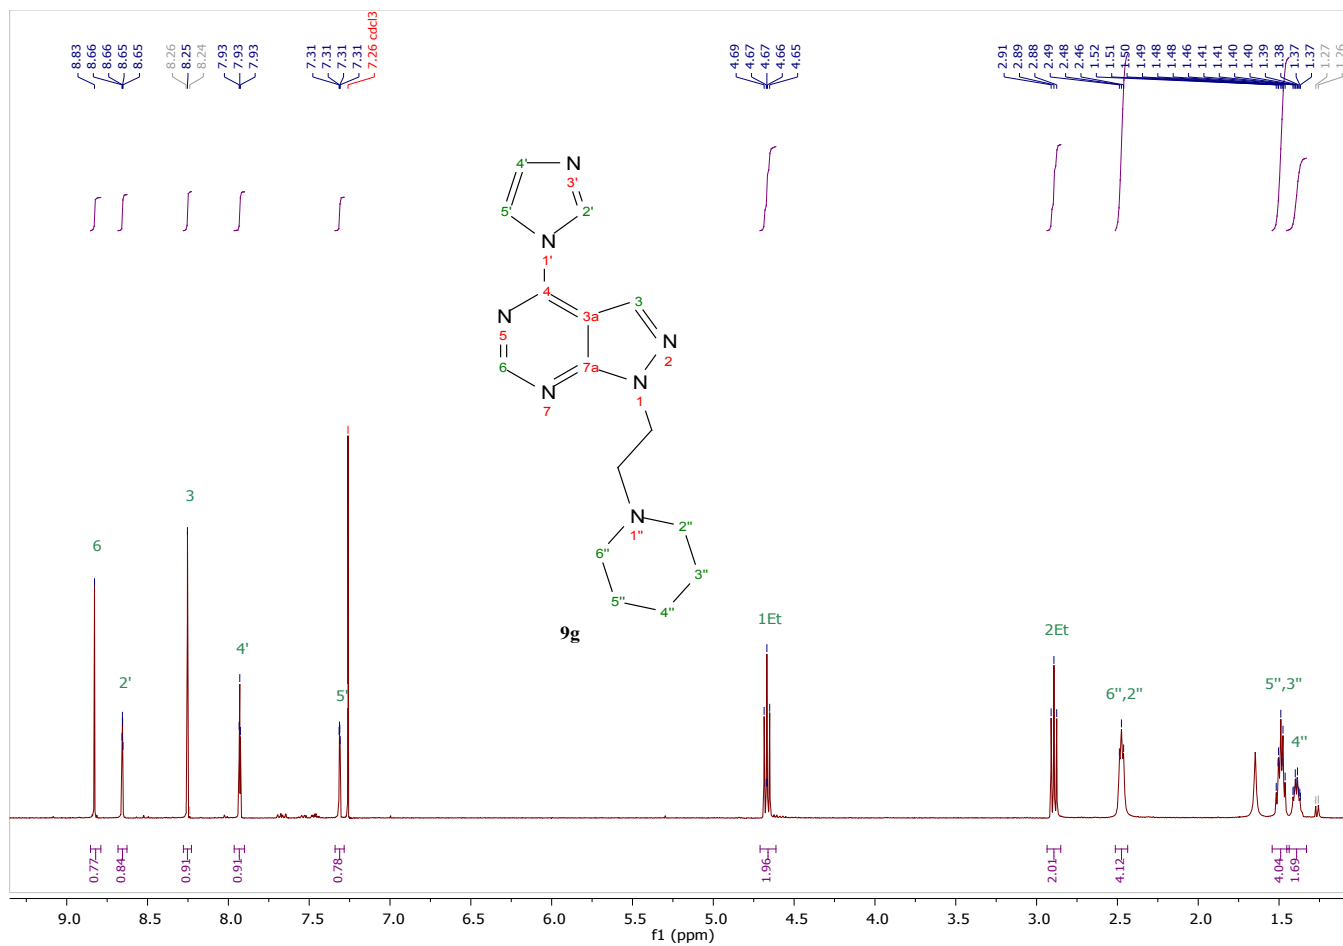

**<sup>13</sup>C-NMR spectrum**

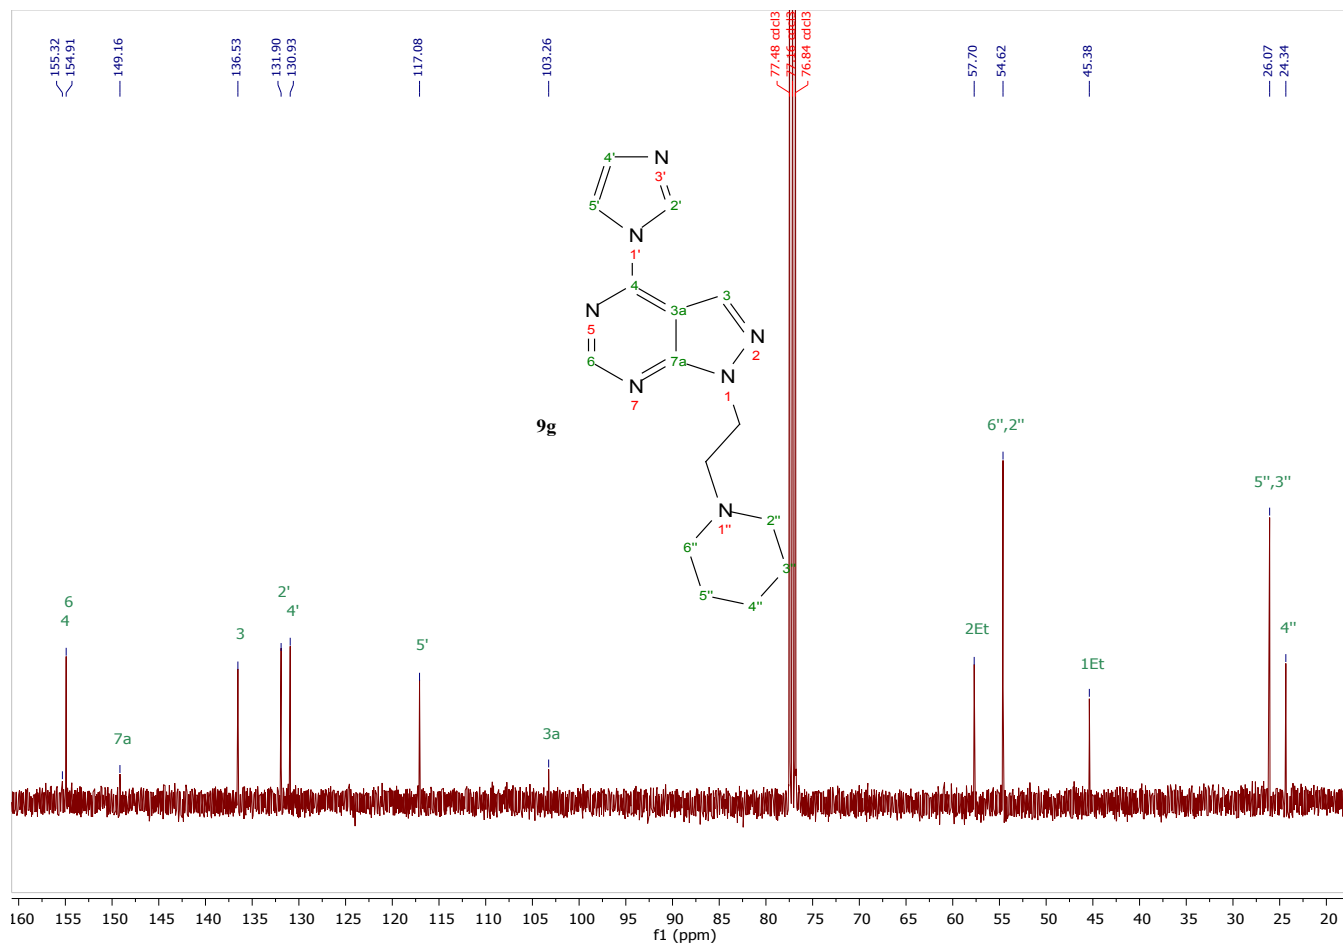

## HRMS Spectrum

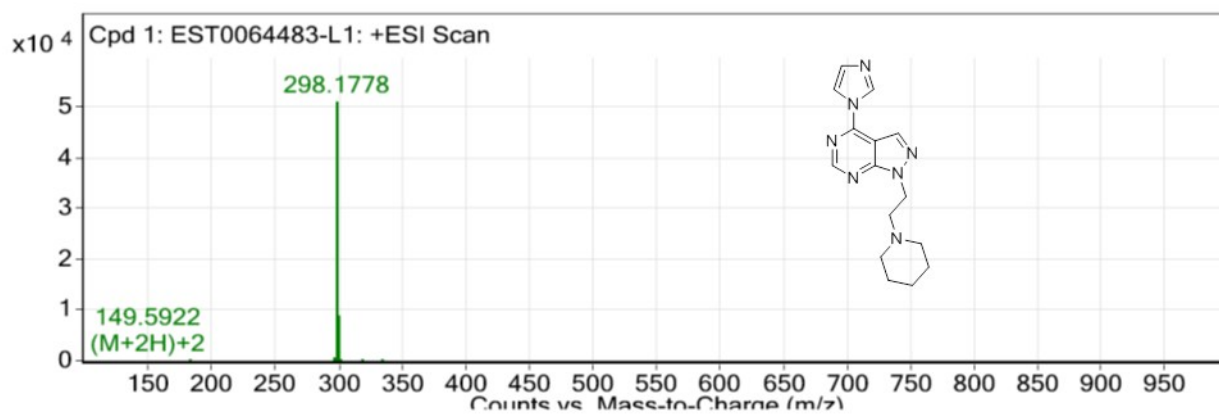

## PDA Chromatogram

3: UV Detector: 210\_320 0.4000-2.1200: Smooth (Mn, 2x3), 2.2000-2.9000: Smooth (Mn, 1x2) 5.529e+1  
 Range: 5.543e+1

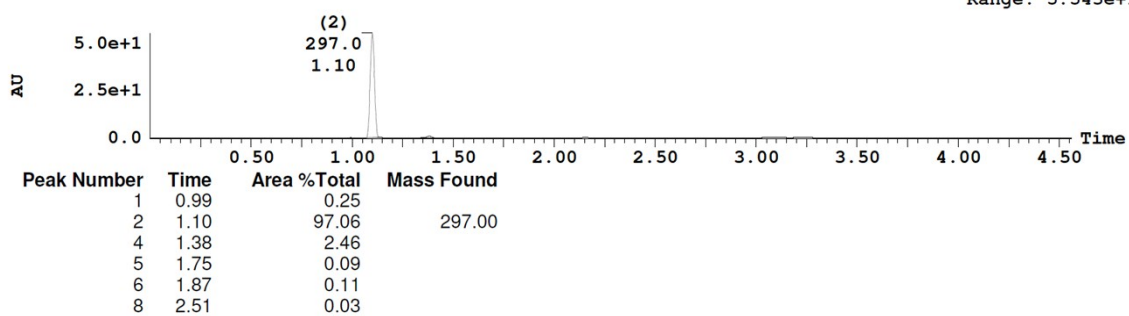

## Spectra of Compound 9i

### <sup>1</sup>H-NMR spectrum

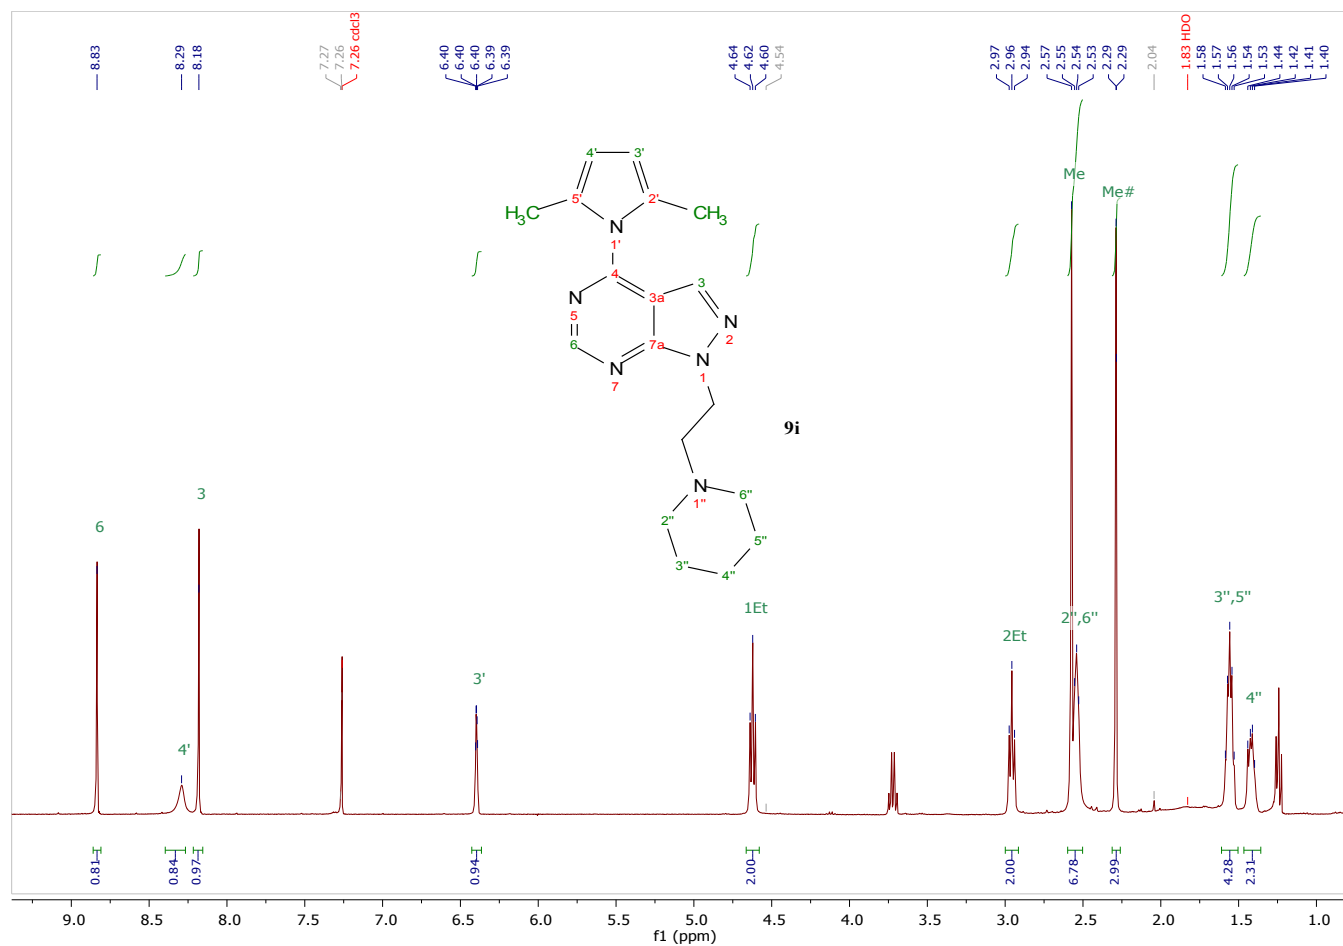

### <sup>13</sup>C-NMR spectrum

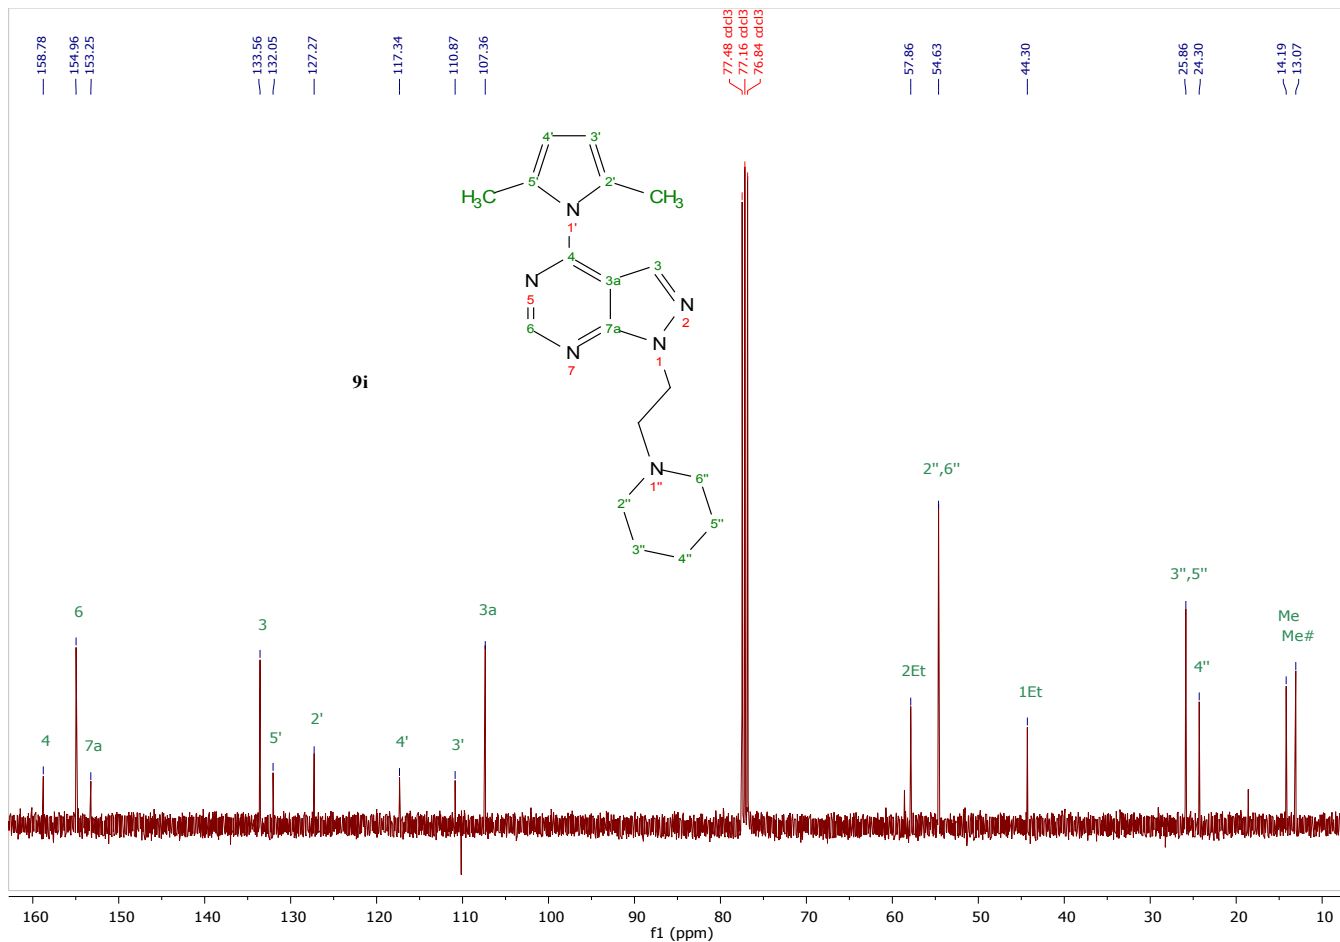

### HRMS Spectrum

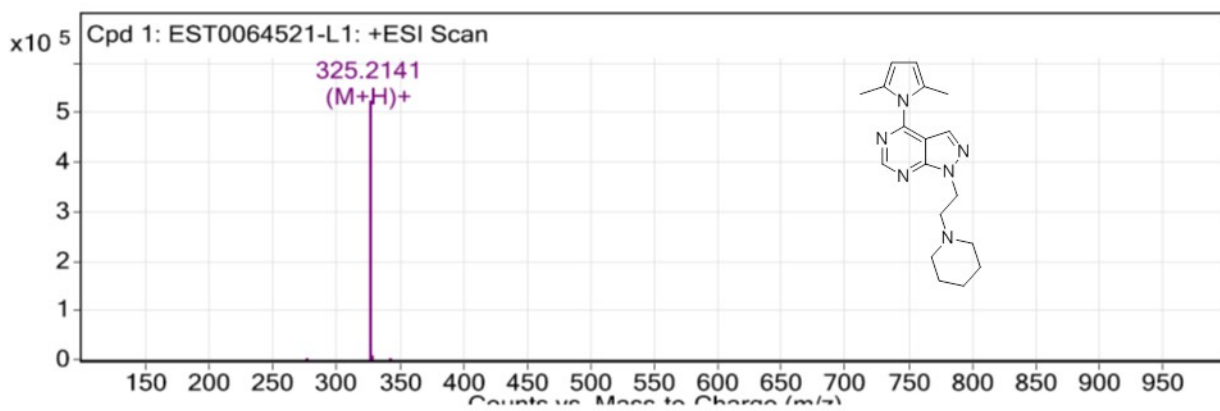

### PDA Chromatogram



3: UV Detector: 210\_320 0.1000-2.1200: Smooth (Mn, 2x3), 2.2000-2.9000: Smooth (Mn, 1x2) 3.614e+1  
 Range: 3.636e+1

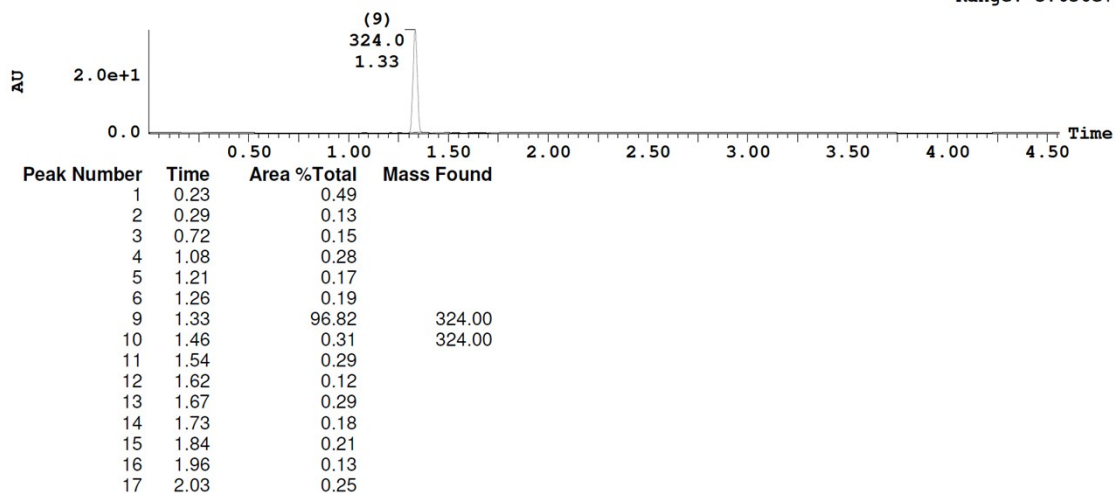

## Spectra of Compound 10a

### <sup>1</sup>H-NMR spectrum

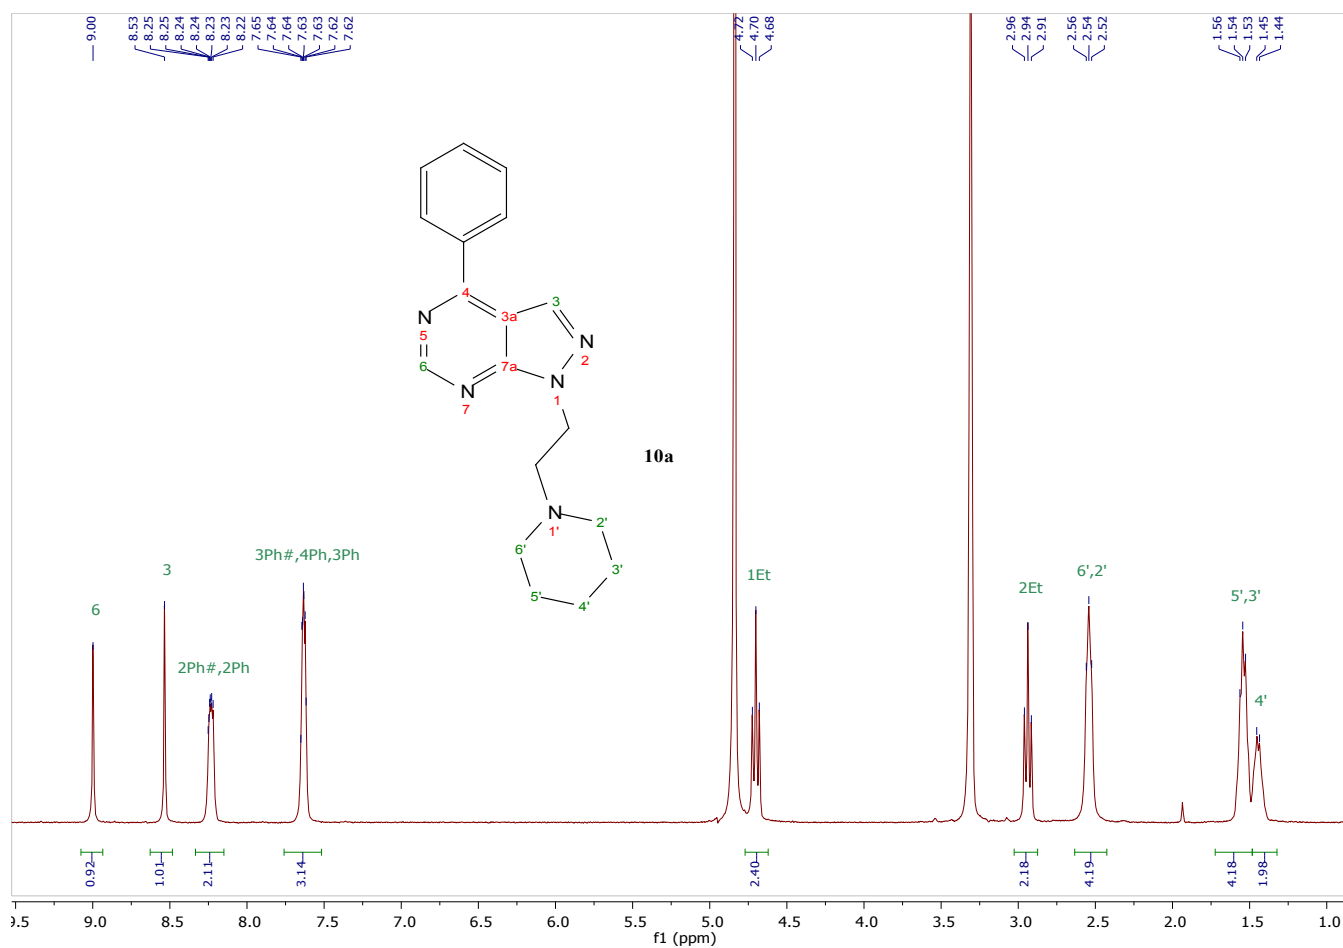

## HRMS Spectrum

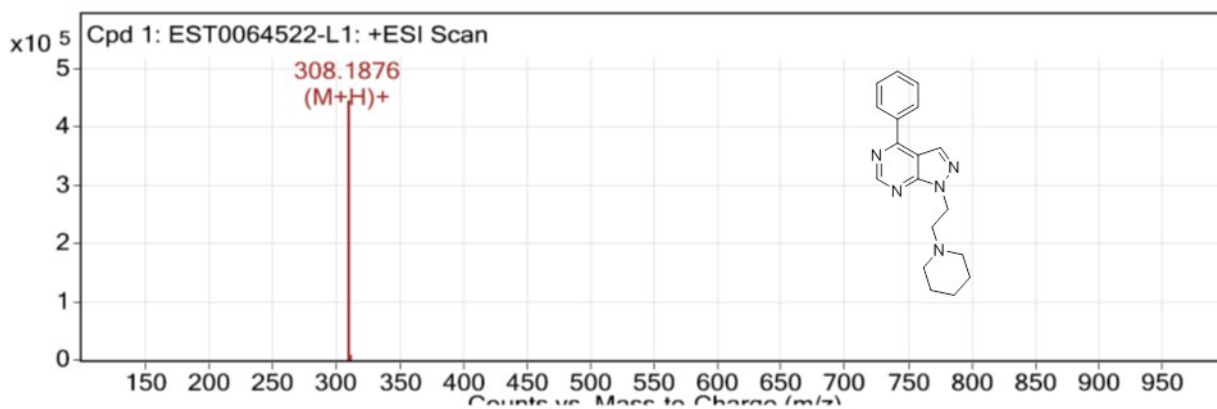

## PDA Chromatogram

3: UV Detector: 210\_320 0.1000-2.1200: Smooth (Mn, 2x3), 2.2000-2.9000: Smooth (Mn, 1x2) 1.37e+2  
Range: 1.372e+2

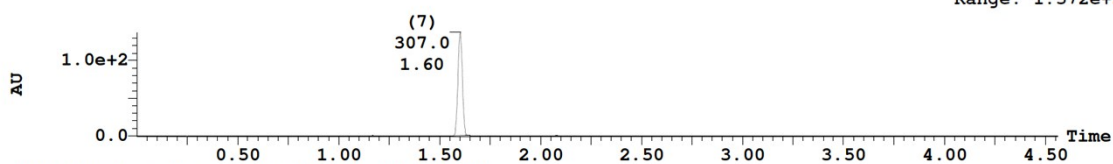

| Peak Number | Time | Area %Total | Mass Found |
|-------------|------|-------------|------------|
| 1           | 0.22 | 0.13        |            |
| 2           | 0.25 | 0.08        |            |
| 3           | 0.29 | 0.06        |            |
| 4           | 1.17 | 0.29        |            |
| 5           | 1.53 | 0.05        | 307.00     |
| 7           | 1.60 | 98.74       | 307.00     |
| 9           | 1.67 | 0.06        | 307.00     |
| 10          | 1.84 | 0.05        | 307.00     |
| 11          | 1.95 | 0.07        |            |
| 12          | 2.00 | 0.09        |            |
| 13          | 2.04 | 0.06        |            |
| 14          | 2.08 | 0.29        |            |
| 15          | 2.45 | 0.04        |            |

## Spectra of Compound 12f

### <sup>1</sup>H-NMR spectrum

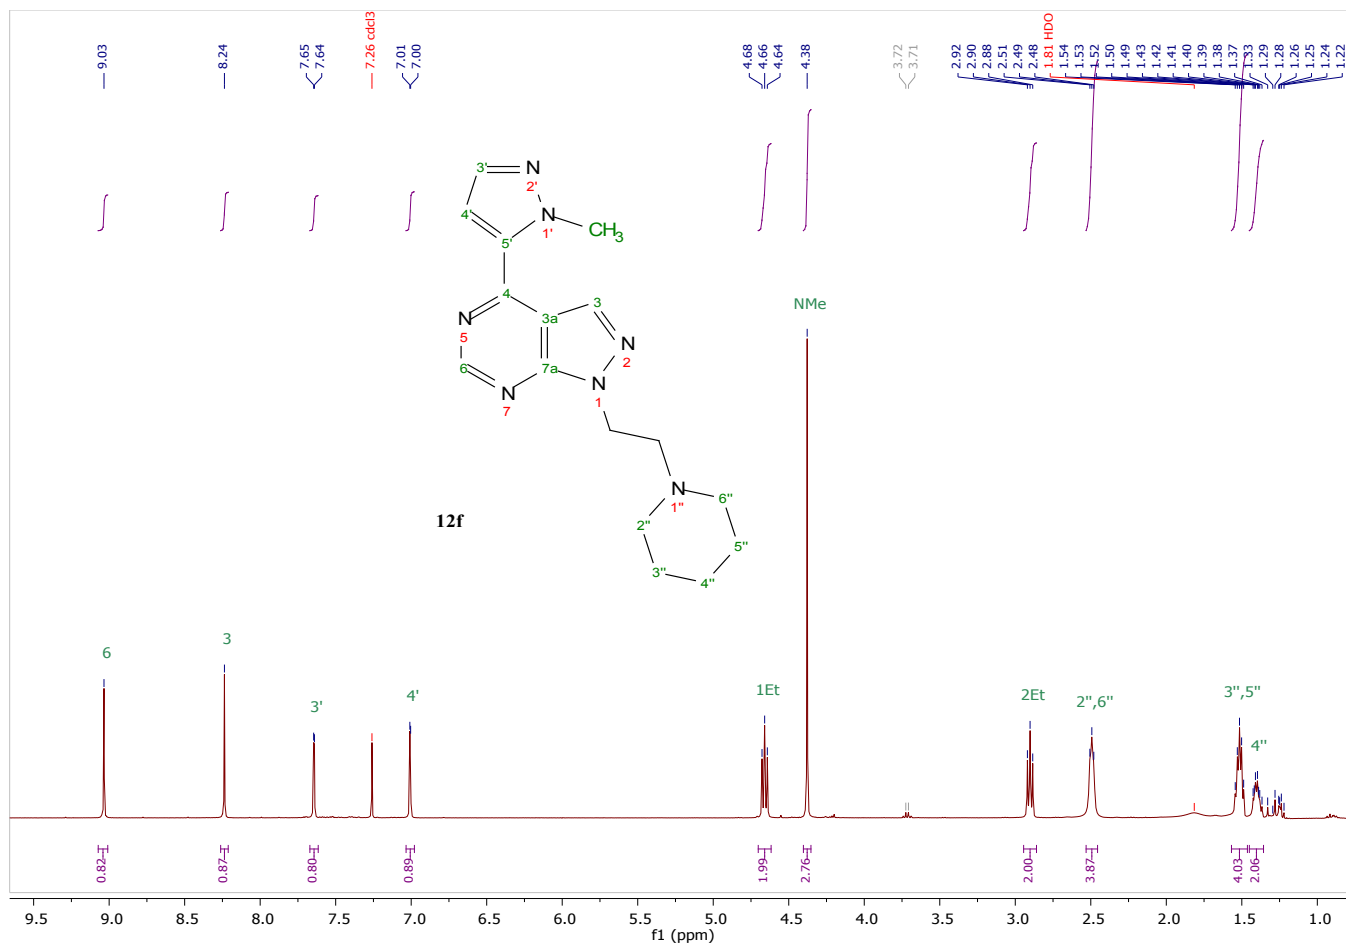

**<sup>13</sup>C-NMR spectrum**

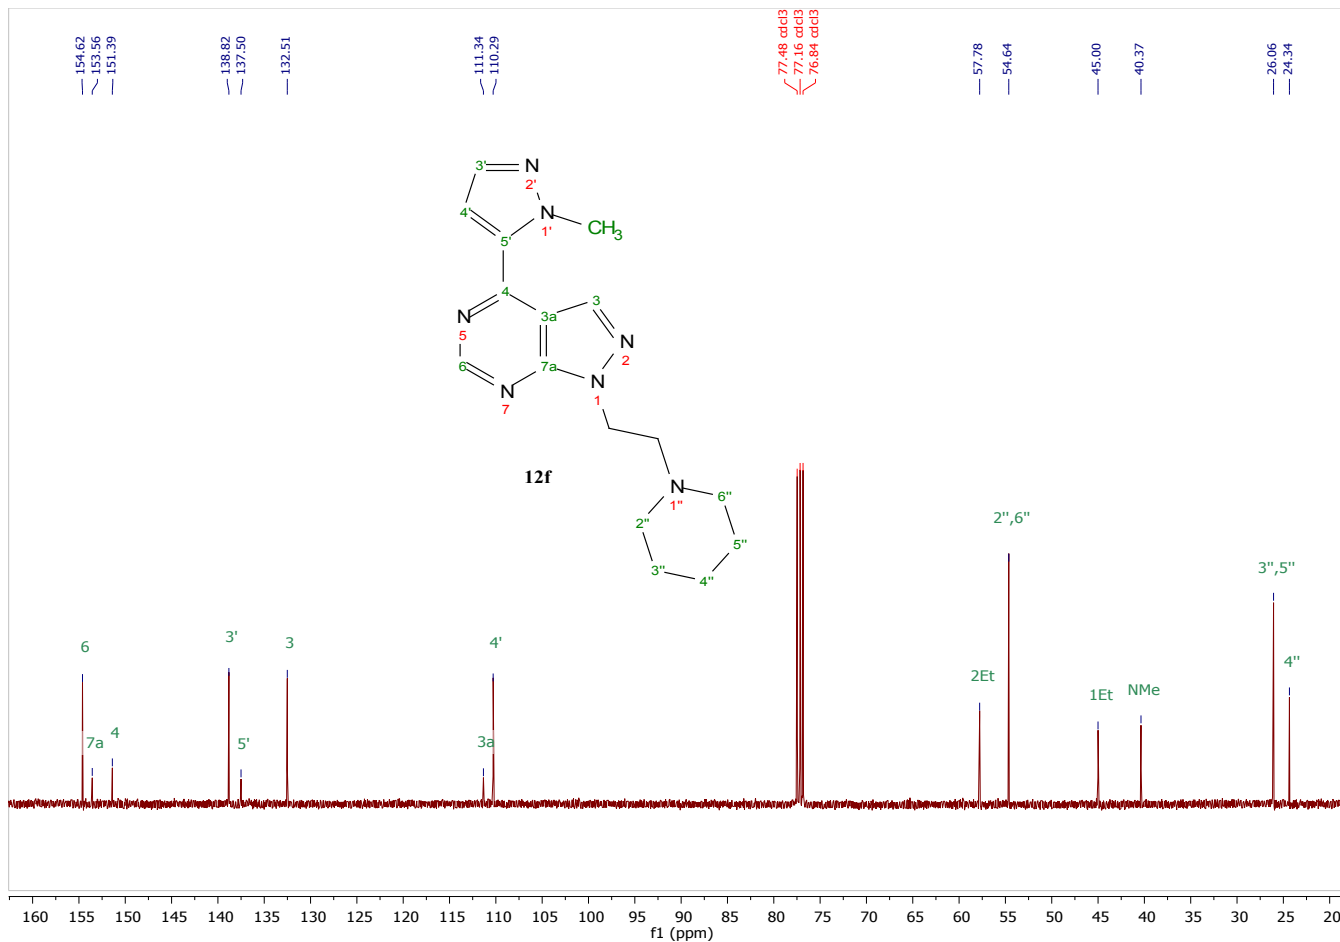

## HRMS Spectrum

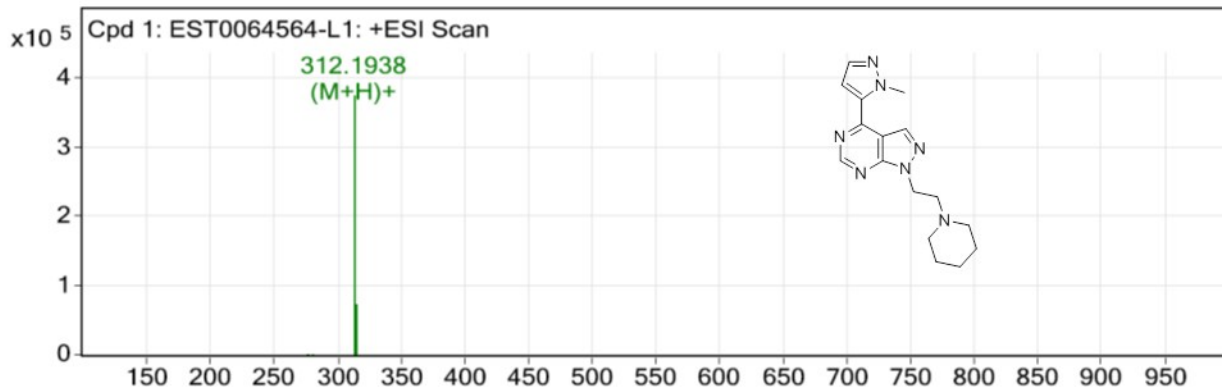

## PDA Chromatogram

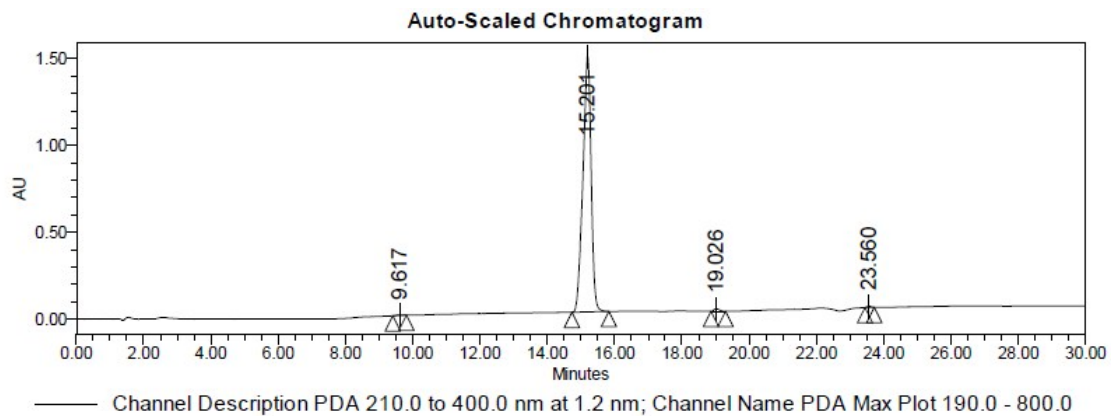

**Peak Results**

|   | SampleName           | RT     | Area     | % Area |
|---|----------------------|--------|----------|--------|
| 1 | EST64564_ga23904025x | 9.617  | 36167    | 0.14   |
| 2 | EST64564_ga23904025x | 15.201 | 24980259 | 99.02  |
| 3 | EST64564_ga23904025x | 19.026 | 153697   | 0.61   |
| 4 | EST64564_ga23904025x | 23.560 | 57507    | 0.23   |

## Spectra of Compound 12l

### <sup>1</sup>H-NMR spectrum

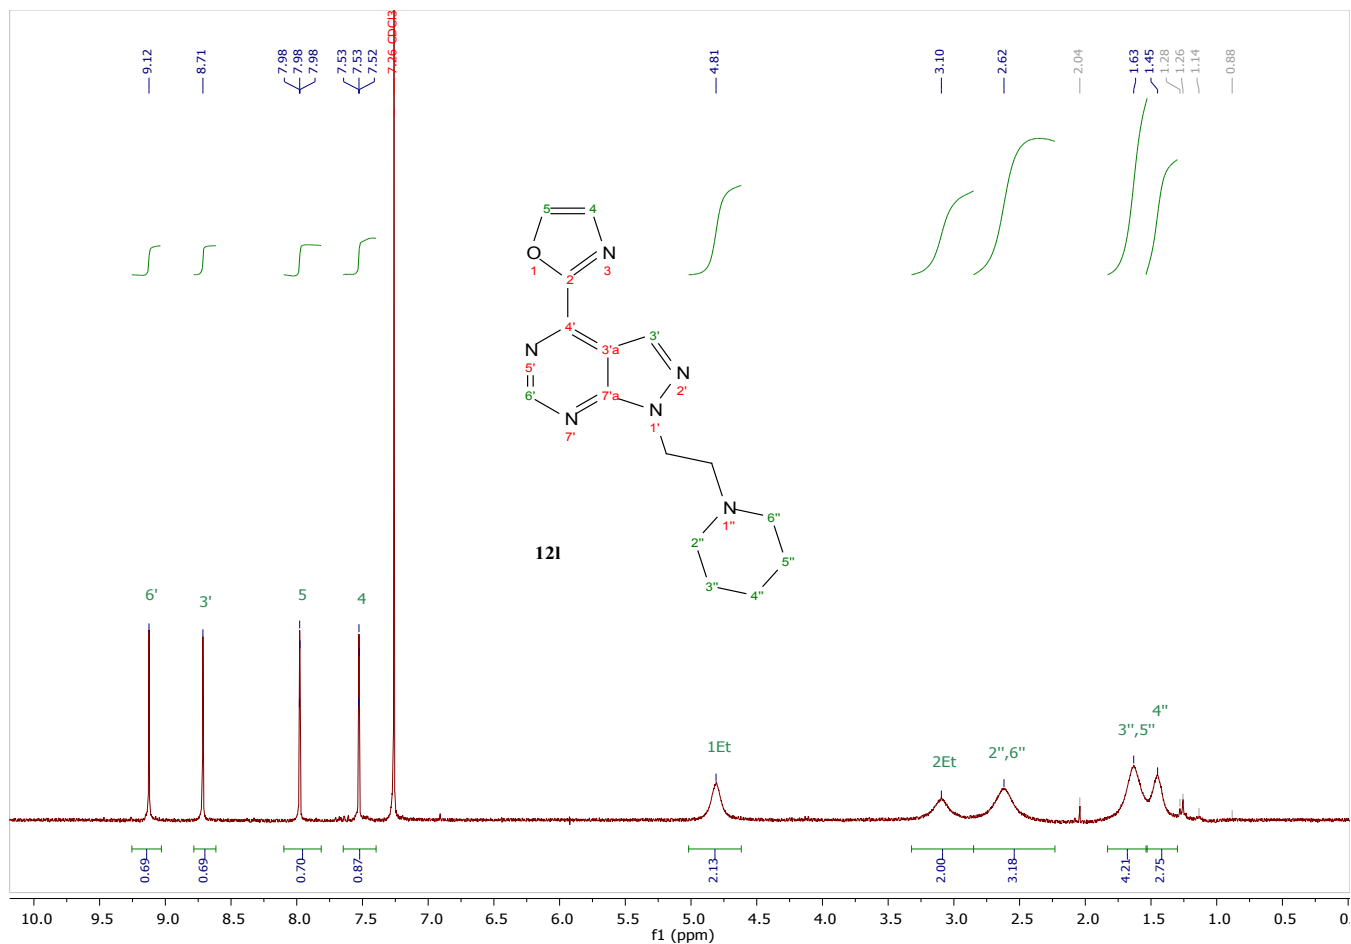

### HRMS Spectrum

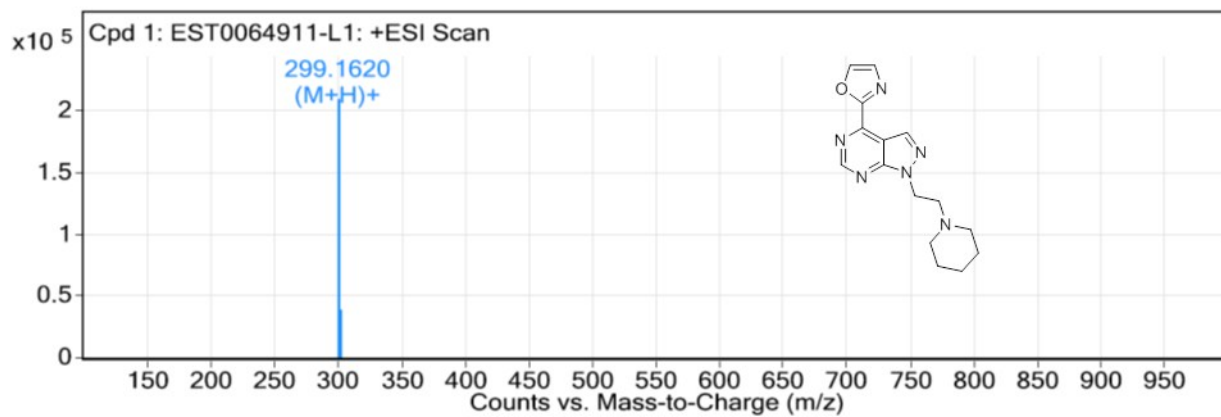

### PDA Chromatogram

3: UV Detector: 210\_320 0.5000-2.4300, 2.4800-3.3000  
(2)

1.027e+2  
Range: 1.029e+2

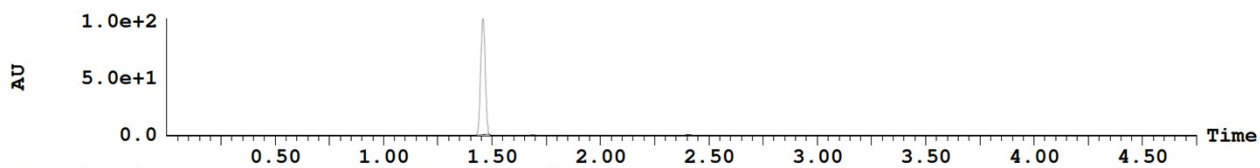

| Peak Number | Time | Area %Total | Mass Found |
|-------------|------|-------------|------------|
| 2           | 1.46 | 98.47       | 298.00     |
| 4           | 1.69 | 0.79        | 298.00     |
| 5           | 2.41 | 0.66        |            |
| 6           | 2.56 | 0.07        |            |
| 7           | 2.76 | 0.01        |            |
| 8           | 2.79 | 0.01        |            |
